# Supplementary material for: Effects of turnover and stability of health staff on quality of care in remote communities of the Northern Territory, Australia: a retrospective cohort study
Source: PubMed Central journal article supplement — BMJ Open. 2021 Oct 19;11(10):e055635. doi: 10.1136/bmjopen-2021-055635 (PMC8527144; doi:10.1136/bmjopen-2021-055635), 2021-10-19
Supplement: bmjopen-2021-055635.draft_revisions.pdf [file bmjopen-2021-055635.draft_revisions.pdf]

# BMJ Open

BMJ Open is committed to open peer review. As part of this commitment we make the peer review history of every article we publish publicly available.

When an article is published we post the peer reviewers' comments and the authors' responses online. We also post the versions of the paper that were used during peer review. These are the versions that the peer review comments apply to.

The versions of the paper that follow are the versions that were submitted during the peer review process. They are not the versions of record or the final published versions. They should not be cited or distributed as the published version of this manuscript.

BMJ Open is an open access journal and the full, final, typeset and author-corrected version of record of the manuscript is available on our site with no access controls, subscription charges or pay-per-view fees (<http://bmjopen.bmj.com>).

If you have any questions on BMJ Open's open peer review process please email [info.bmjopen@bmj.com](mailto:info.bmjopen@bmj.com)

# BMJ Open

## Effects of turnover and stability of health staff on quality of care in remote communities of the Northern Territory, Australia: a retrospective cohort study

|                               |                                                                                                                                                                                                                                                                                                                                                                                                                                                                                                                                                                                                                         |
|-------------------------------|-------------------------------------------------------------------------------------------------------------------------------------------------------------------------------------------------------------------------------------------------------------------------------------------------------------------------------------------------------------------------------------------------------------------------------------------------------------------------------------------------------------------------------------------------------------------------------------------------------------------------|
| Journal:                      | <i>BMJ Open</i>                                                                                                                                                                                                                                                                                                                                                                                                                                                                                                                                                                                                         |
| Manuscript ID                 | bmjopen-2021-055635                                                                                                                                                                                                                                                                                                                                                                                                                                                                                                                                                                                                     |
| Article Type:                 | Original research                                                                                                                                                                                                                                                                                                                                                                                                                                                                                                                                                                                                       |
| Date Submitted by the Author: | 20-Jul-2021                                                                                                                                                                                                                                                                                                                                                                                                                                                                                                                                                                                                             |
| Complete List of Authors:     | Jones, Michael; Macquarie University<br>Zhao, Yuejen; Northern Territory Department of Health, Population and Digital Health<br>Guthridge, Steven; Menzies School of Health Research, Charles Darwin University<br>Russell, Deborah; Menzies School of Health Research Alice Springs Office, Charles Darwin University<br>Ramjan, Mark; Northern Territory Department of Health, Clinical Governance, Darwin Region & Strategic Primary Health Care<br>Humphreys, John; Monash University, School of Rural Health<br>Wakerman, John ; Menzies School of Health Research Alice Springs Office, Charles Darwin University |
| Keywords:                     | Human resource management < HEALTH SERVICES ADMINISTRATION & MANAGEMENT, Quality in health care < HEALTH SERVICES ADMINISTRATION & MANAGEMENT, PRIMARY CARE                                                                                                                                                                                                                                                                                                                                                                                                                                                             |
|                               |                                                                                                                                                                                                                                                                                                                                                                                                                                                                                                                                                                                                                         |

SCHOLARONE™  
Manuscripts

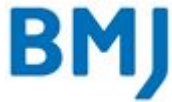

I, the Submitting Author has the right to grant and does grant on behalf of all authors of the Work (as defined in the below author licence), an exclusive licence and/or a non-exclusive licence for contributions from authors who are: i) UK Crown employees; ii) where BMJ has agreed a CC-BY licence shall apply, and/or iii) in accordance with the terms applicable for US Federal Government officers or employees acting as part of their official duties; on a worldwide, perpetual, irrevocable, royalty-free basis to BMJ Publishing Group Ltd ("BMJ") its licensees and where the relevant Journal is co-owned by BMJ to the co-owners of the Journal, to publish the Work in this journal and any other BMJ products and to exploit all rights, as set out in our [licence](#).

The Submitting Author accepts and understands that any supply made under these terms is made by BMJ to the Submitting Author unless you are acting as an employee on behalf of your employer or a postgraduate student of an affiliated institution which is paying any applicable article publishing charge ("APC") for Open Access articles. Where the Submitting Author wishes to make the Work available on an Open Access basis (and intends to pay the relevant APC), the terms of reuse of such Open Access shall be governed by a Creative Commons licence – details of these licences and which [Creative Commons](#) licence will apply to this Work are set out in our licence referred to above.

Other than as permitted in any relevant BMJ Author's Self Archiving Policies, I confirm this Work has not been accepted for publication elsewhere, is not being considered for publication elsewhere and does not duplicate material already published. I confirm all authors consent to publication of this Work and authorise the granting of this licence.

1  
2  
3 Title: Effects of turnover and stability of health staff on quality of care in remote  
4  
5 communities of the Northern Territory, Australia: a retrospective cohort study  
6  
7  
8  
9

10 Authors: Michael P Jones,<sup>1</sup> Yuejen Zhao,<sup>2</sup> Steven Guthridge,<sup>3</sup> Deborah Jane Russell,<sup>4</sup> Mark  
11  
12 Ramjan,<sup>5</sup> John S Humphreys,<sup>6</sup> John Wakerman<sup>4</sup>  
13  
14  
15  
16  
17

18 Author affiliations  
19

20 <sup>1</sup>Faculty of Human Sciences, Macquarie University, Sydney, New South Wales,  
21  
22 Australia  
23

24 <sup>2</sup>NT Department of Health, Innovation and Research, Darwin, Northern Territory,  
25  
26 Australia  
27

28 <sup>3</sup>Menzies School of Health Research, Charles Darwin University, Casuarina, Northern  
29  
30 Territory, Australia  
31  
32

33 <sup>4</sup>Menzies School of Health Research, Charles Darwin University, Alice Springs, Northern  
34  
35 Territory, Australia  
36  
37

38 <sup>5</sup>Population and Primary Health Care, Top End Health Services, NT Department of Health,  
39  
40 Darwin, NT, Australia  
41  
42

43 <sup>6</sup>Monash Rural Health, Monash University, Bendigo, Victoria, Australia  
44  
45  
46  
47  
48  
49  
50  
51

52 Corresponding author:  
53  
54  
55

56 Prof Michael P. Jones  
57

58 Psychology Department  
59  
60

1  
2  
3  
4  
5  
6  
7  
8  
9  
10  
11  
12  
13  
14  
15  
16  
17  
18  
19  
20  
21  
22  
23  
24  
25  
26  
27  
28  
29  
30  
31  
32  
33  
34  
35  
36  
37  
38  
39  
40  
41  
42  
43  
44  
45  
46  
47  
48  
49  
50  
51  
52  
53  
54  
55  
56  
57  
58  
59  
60

Macquarie University  
North Ryde NSW 2109  
Australia

fax: n/a

email: [mike.jones@mq.edu.au](mailto:mike.jones@mq.edu.au)

For peer review only

1  
2  
3 Abstract  
4  
5  
6  
7

8 **Objectives** To evaluate the relationship between markers of staff employment stability and  
9  
10 use of short-term health care workers with markers of quality of care.  
11

12 **Design** Retrospective cohort.  
13

14 **Setting** Northern Territory Government primary health care clinics in remote communities.  
15  
16

17 **Outcome Measures** Resident Remote Area Nurse (RAN) and Aboriginal Health Practitioner  
18 (AHP) turnover rates, stability rates and the proportional use of agency nurses.  
19  
20

21 **Results** The proportion of resident Aboriginal clients receiving high quality care as measured  
22 by various quality indicators varied considerably across indicators and clinics. Higher quality  
23 care was more likely to be received for management of chronic diseases such as diabetes  
24 and least likely to be received for general/preventive adult health checks. Many indicators  
25 had target goals of 0.80 which were mostly not achieved. The evidence for associations  
26 between decreased stability measures or increased use of agency nurses and reduced  
27 achievement of quality indicators was not as clearly supported as hypothesised. For the  
28 majority of associations, the overall effect sizes were small (close to zero) and failed to  
29 reach statistical significance. Where statistically significant associations were found, they  
30 were generally in the hypothesised direction.  
31  
32  
33  
34  
35  
36  
37  
38  
39  
40  
41  
42  
43  
44  
45

46 **Conclusions** Two clear findings emerge from this study. One is that lower staff stability and  
47 greater use of short-term health workforce is associated with deficits in quality of care for  
48 some clinics but not for others. Understanding the reasons for this variation would  
49 significantly aid the provision of clinical care in remote Australia. The second is that the data  
50 needed to understand this important question of quality of care are challenging to obtain.  
51  
52  
53  
54  
55  
56  
57  
58  
59  
60

1  
2  
3 The public interest would be served by the development of health information systems that  
4  
5 better facilitate analyses such as those undertaken here.  
6  
7  
8  
9

### 10 **Strengths and limitations of this study**

- 13 • Data are for an entire population—remote living residents in communities serviced  
14 by Northern Territory Department of Health;  
15
- 17 • Analyses adjusted for key potential confounders;  
18
- 20 • The major limitation was the retrospective design, relying on routinely collected and  
21 administrative data.  
22  
23  
24  
25  
26  
27  
28  
29  
30  
31  
32  
33  
34  
35  
36  
37  
38  
39  
40  
41  
42  
43  
44  
45  
46  
47  
48  
49  
50  
51  
52  
53  
54  
55  
56  
57  
58  
59  
60

## INTRODUCTION

Australia is a geographically large country (7.7 million square kilometres) with a concentration of both population and health care resources along its eastern and southern seaboard.<sup>1</sup> In 2019, 69% of the Australian estimated resident population lived in the eastern and southern seaboard State capital cities and three large regional towns (Newcastle, Wollongong and Geelong)<sup>2</sup>. A relatively small fraction of the Australia's health care resources are used to service the primary health care (PHC) needs of its extensive rural and remote populations, with the National Rural Health Alliance estimating a large rural health expenditure deficit of approximately \$2bn per annum.<sup>3</sup>

In non-metropolitan Australia, access to PHC is further limited by the combination of high health need and the need for cultural competency when providing health services for Australian Aboriginal and Torres Strait Islander populations who have much greater health needs across both acute and chronic conditions relative to all Australians.<sup>4</sup> This is particularly apparent in the Aboriginal population of the Northern Territory (NT) where chronic diseases such as cardiovascular disease and diabetes are up to four times more prevalent and life expectancy at birth is approximately 16 years less than the corresponding measure for Australia as a whole.<sup>5</sup> While continuity of care is important for all patients, it is especially important for vulnerable populations, such as Aboriginal and Torres Strait Islander populations living in small, isolated communities.<sup>6,7</sup> Continuity of high quality PHC can help ensure chronic health conditions are prevented where possible, and diagnosed early and managed optimally where not, ensuring that patients avoid potentially preventable hospitalisations.<sup>8,9</sup>



1  
2  
3 The long-standing geographical maldistribution of general practitioners (GPs) has been the  
4 target of numerous programs by government and health professional bodies over a long  
5  
6 target of numerous programs by government and health professional bodies over a long  
7  
8 period, with only mixed success.<sup>10-12</sup> In geographically remote areas, PHC services are more  
9  
10 commonly provided by resident Remote Area Nurses (RANs) and Aboriginal Health  
11  
12 Practitioners (AHPs), supported by visiting medical, nursing and allied health professionals,  
13  
14 and other short-term health workers engaged on a fly-in fly-out or drive-in-drive-out basis  
15  
16 and often engaged through employment agencies.<sup>13</sup> While resident staff remain in a  
17  
18 community from months to several years and therefore get to know and be known by  
19  
20 community members, short-term employment agency staff may only be in a community for  
21  
22 a period of weeks. Such short tenure makes continuity of care less attainable and staff less  
23  
24 able to develop appropriate levels of cultural and social awareness to engage effectively  
25  
26 with local residents, leading to lower utilisation of PHC services.<sup>14,15</sup> Lower PHC utilisation  
27  
28 may contribute to poorer health outcomes: better access and utilisation of PHC by  
29  
30 Aboriginal people living in remote NT communities and remote outstations is associated  
31  
32 with lower mortality, lower morbidity and more cost-effective health care, though the  
33  
34 association between PHC utilisation and hospitalisations is more complex.<sup>16-18</sup>  
35  
36  
37  
38  
39  
40  
41  
42 A further potential consequence of poor continuity of care and cultural attunement of  
43  
44 health care staff is reduced quality of care. Short-term staff may focus on acute care needs  
45  
46 and neglect or have insufficient awareness of preventive and chronic care needs, such as  
47  
48 health promotion, health screening, monitoring chronic health conditions, encouraging  
49  
50 smoking cessation or checking the immunisation status of infants and adults. Most, though  
51  
52 not all, research shows that continuity of PHC provider is associated with better control of  
53  
54 type 2 diabetes<sup>19-22</sup> as well as increased provision of preventive care services including  
55  
56 immunisations and screening for hypertension, alcohol abuse and high cholesterol levels.<sup>23</sup>  
57  
58  
59  
60

1  
2  
3 However, the extent to which continuity of care and measures of staff turnover and stability  
4  
5 are associated with quality of care in complex cross-cultural contexts characterised by  
6  
7 reliance on short-term PHC providers is not well-understood. While research using a case  
8  
9 study design suggests that in remote NT, PHC workforce turnover is the most significant  
10  
11 barrier to successful quality improvement, the association between workforce turnover or  
12  
13 stability and quality of PHC in remote NT is yet to be verified using stronger study designs.<sup>24</sup>  
14  
15  
16

17  
18 This article therefore seeks to evaluate the relationship between markers of staff  
19  
20 employment stability and turnover and use of short-term PHC staff with markers of quality  
21  
22 of care, in order to determine whether these are detrimental to the care received by  
23  
24 residents of remote locations. We hypothesised that stability would be positively associated  
25  
26 with quality measures and that turnover and the use of short-term PHC staff would be  
27  
28 negatively associated with quality measures. We also sought to identify factors which may  
29  
30 counter hypothesised reduced quality of care caused by lower stability, higher turnover or  
31  
32 higher use of short-term staff.  
33  
34  
35  
36  
37  
38  
39  
40

## 41 **METHODS**

### 42 43 44 45 46 Study design and setting

47  
48  
49  
50 This observational study has a retrospective cohort design: the cohort consists of patients,  
51  
52 RANs, AHPs and short-term staff of 48 NT Department of Health (DoH) remote clinics during  
53  
54 the period 2011-2015, inclusive.  
55  
56  
57  
58  
59  
60

## Data

Data were provided by the NT DoH. Workforce data were obtained from the Personnel Information and Payroll Systems (PIPS) dataset. PIPS data provided comprehensive, individual-level, de-identified information on all RANs and AHPs paid directly through the NT DoH payroll. These data were used to ascertain the number of RAN and AHP exits from remote health services and to calculate annual turnover and 12-month stability rates. The Government Accounting System (GAS) was used to identify labour hire costs for agency nurses paid directly by employment agencies (hereafter termed agency nurses). The aggregated full-time equivalent (FTE) for agency-employed nurses working in remote health services was derived using the standard NT DoH formula of agency labour expenses divided by twice the departmental annual average nurse personnel cost.<sup>25</sup>

Quarterly Traffic Light Reports were produced by NT DoH staff for each remote community as part of the Chronic Conditions Management Model.<sup>26</sup> The combined Traffic Light Report, which has retrospective data for all NT DoH remote health clinics, was the source of data for twelve quality indicators. Data for some indicators were available every 3 months from March 2012 through to November 2015, though reporting on other indicators commenced at a later date (the latest being August 2013). Additionally, routine health services reports of NT Aboriginal Health Key Performance Indicators (AHKPIs) were the source of data for a further twelve quality indicators. NT AHKPI data were available for 48 of 53 NT DoH clinics in the larger study. NT AHKPI data were not available for five clinics that used a different PHC electronic clinical records management system.

## Measures

1  
2  
3 In this study the main independent variables were clinic-level measures of RAN and AHP  
4 annual turnover and 12-month stability, and the proportional use of agency nurses.  
5  
6 Hereafter, these three measures will be collectively referred to as markers of staff  
7  
8 employment stability. We used three different measures of staff employment stability  
9  
10 because of the complexities involved in staffing remote health services, the known heavy  
11  
12 reliance on agency nurses in remote NT and because none of these workforce metrics on  
13  
14 their own provide a sufficiently comprehensive picture of workforce mobility patterns.<sup>27,28</sup>  
15  
16 The three main workforce metrics are defined in Table 1. An additional metric, the number  
17  
18 of exits from a health service (which is the numerator of the turnover metric), was used in  
19  
20 the Latent Class Analysis.  
21  
22  
23  
24  
25  
26  
27  
28  
29  
30  
31  
32

[Table 1 about here]

33 Additional independent variables included remote community population size, average  
34  
35 number of employees, Euclidean distance in kilometres to the major centres of Darwin or  
36  
37 Alice Springs (whichever was closest) and Euclidean distance in kilometres to the nearest of  
38  
39 the five NT hospitals (distances calculated using google maps). The socioeconomic status of  
40  
41 the community in which each clinic was located was measured using the Index of Relative  
42  
43 Socio-economic Advantage and Disadvantage (IRSAD) for clinic catchment  
44  
45 areas' average scores for Indigenous localities (ILOC)<sup>29</sup> as measured in the 2011 national  
46  
47 census conducted by the Australian Bureau of Statistics (ABS). The Aboriginal composition of  
48  
49 each community was measured as the proportion of the resident population identifying as  
50  
51 an Aboriginal person in the 2016 census.<sup>30</sup> The latter was dichotomised into whether or not  
52  
53 Aboriginal people comprised a majority of the population (>50%) in the community.  
54  
55  
56  
57  
58  
59  
60

1  
2  
3 We were initially provided with data for 24 quality indicators (several of which were the  
4 same indicator but measured using different data sources at slightly different time points).  
5  
6 Some indicators also had more than one component. For example, child immunisation was  
7  
8 categorised into different age groups and glycated haemoglobin (HbA1c) results were  
9  
10 categorised into different levels of glycaemic control. Our aim was to examine a sufficient  
11  
12 range of indicators of quality of care to ensure that a reasonable spectrum of PHC activities  
13  
14 was covered by the indicators, rather than to be exhaustive. We therefore grouped quality  
15  
16 indicators into three categories: child and maternal health; chronic disease management;  
17  
18 and preventive health activity, and reduced the number of indicators, ensuring there were  
19  
20 at least three indicators within each category. (Table 2) The reporting period for the  
21  
22 indicators ranged from six months for the HbA1c test reported in the NT AHKPIs, up to two  
23  
24 years.  
25  
26  
27  
28  
29  
30  
31

32 [Insert Table 2 about here]  
33  
34  
35  
36  
37

### 38 **Statistical approach**

39  
40 The associations between markers of staff employment stability (independent variables, IV)  
41  
42 and markers of quality (dependent variables, DV) were assessed using linear regression  
43  
44 which employed the linearisation method<sup>31</sup> to estimate the within-clinic correlation and  
45  
46 adjust standard errors accordingly. Each DV was expressed as the sequential change from  
47  
48 the previous period (month, quarter or half year) to express change in indicator status. Due  
49  
50 to the non-Normal distribution of some outcome variables, formal statistical inference  
51  
52 employed the nonparametric bootstrap method. The direction and strength of the  
53  
54 associations between IVs and DVs is reported through the regression slopes ( $\beta$  coefficients)  
55  
56 along with 95% confidence interval upper and lower limits and two-tailed p-values.  
57  
58  
59  
60

1  
2  
3 Clinic-specific estimates of the associations between IVs and DVs were also calculated using  
4  
5 linear regression and the standard deviation of coefficients is reported as a measure of  
6  
7 between-clinic variation in the influence of markers of staff employment stability on quality  
8  
9 of care.  
10  
11

12  
13 Considerable between-clinic heterogeneity was identified. To aid in understanding clinic  
14  
15 profiles that are associated with stronger or weaker associations, clinics were clustered into  
16  
17 mutually exclusive groups based on their markers of staff employment stability using latent  
18  
19 class models.<sup>32</sup> Variation between clusters of clinics with respect to association (slopes)  
20  
21 between markers of staff employment stability and quality measures were examined to  
22  
23 generate hypotheses concerning clinic factors that might counter the effects of reduced  
24  
25 staffing stability or increased turnover or use of agency nurses. The clustering process can  
26  
27 be hindered by multivariate outliers that have undue influence on the cluster solution.<sup>33,34</sup>  
28  
29 For this reason a two-cluster solution was set as a first step in which forty-four clinics were  
30  
31 allocated to one cluster and just four into the second. The analysis was then repeated on  
32  
33 the forty-four remaining clinics. The four clinics omitted from this analysis yielded  
34  
35 statistically significantly lower stability scores ( $p=0.04$ ), higher turnover ( $p=0.002$ ) and lower  
36  
37 proportional use of agency nurses ( $p=0.004$ ). Quality-of-care measures for the four clinics  
38  
39 that were omitted from the modelling as multivariate outliers were also compared with the  
40  
41 clinics included in the analysis. Given the very small number of clinics omitted it is difficult  
42  
43 to make any firm conclusions, and no differences reached statistical significance, but there  
44  
45 was a general trend for these clinics to have lower rates of meeting quality criteria.  
46  
47  
48  
49  
50  
51  
52  
53

## 54 55 **RESULTS** 56 57 58 59 60

1  
2  
3 Included clinics were relatively small with respect to staffing (Table 3) and located distant  
4  
5 from the major NT centres of Darwin and Alice Springs, on average 304 kilometres (SD=191)  
6  
7 from the nearest of these. The average clinic had 4-5 staff at any point in time although  
8  
9 there was considerable variation between clinics with some having less than one and others  
10  
11 almost twenty. Similarly, there was considerable between-clinic variation in the measures of  
12  
13 turnover, stability and use of short-term staff, with some clinics having mean scores  
14  
15 approximately twice the overall average. Agency nurses made up a little under 20% of  
16  
17 remote staff, on average, although these values also varied considerably between clinics  
18  
19 with the highest being over 40%.  
20  
21  
22  
23  
24  
25

26 [Insert Table 3 about here]  
27  
28  
29  
30  
31

32 The proportion of resident Aboriginal clients receiving high quality care as measured by the  
33  
34 various quality indicators varied considerably across indicators and clinics (with some  
35  
36 variation also evident by dataset). On average, high quality care was more likely to be  
37  
38 received for management of chronic disease such as diabetes and least likely to be received  
39  
40 for general/preventive adult health checks. Many indicators used in the Traffic Light Report  
41  
42 program had target goals of 0.80. These target goals were mostly not achieved.  
43  
44  
45  
46  
47  
48

49 [Insert Table 4 about here]  
50  
51  
52  
53  
54

55 The evidence for associations between markers of staff employment stability and reduced  
56  
57 performance as measured by markers of quality was not as clearly supported as  
58  
59 hypothesised. For the majority of associations reported in Table 4 the overall effect sizes  
60

1  
2  
3 (slopes) were small (close to zero) and failed to reach statistical significance. Where  
4  
5 statistically significant associations were found, however, they were generally in the  
6  
7 hypothesised direction. Examples include increased turnover being associated with lower  
8  
9 proportions of eligible women having pap smears within the previous five years and lower  
10  
11 proportions of children being fully immunised (6-11 months); and increased stability  
12  
13 associated with glycaemic control ( $HbA1c \leq 8\%$ ). There are however exceptions, such as  
14  
15 where increased turnover was associated with higher achievement of adult 55+ health  
16  
17 checks.  
18  
19  
20  
21  
22  
23  
24  
25  
26  
27

[Insert Figure 1 about here]

28  
29 A common finding was considerable between-clinic variation in markers of staff  
30  
31 employment stability and quality indicators, although the degree of variation between  
32  
33 clinics was inconsistent and differed with different levels of a quality indicator. Figure 1  
34  
35 illustrates this for the association between proportion of agency nurse and three levels of  
36  
37 provision of antenatal care where the median slope is close to zero for all three levels of the  
38  
39 antenatal care indicator. During the first and second trimester, the association with  
40  
41 proportion of agency nurses appears to vary widely between positive and negative values  
42  
43 while for receiving care at any time before the end of pregnancy there is relatively little  
44  
45 between-clinic variation. Hence the overall association effect size can hide considerable  
46  
47 variation in the direction and magnitude of association in individual clinics.  
48  
49  
50  
51  
52  
53  
54  
55  
56  
57  
58  
59  
60

[Insert Table 5 about here]



1  
2  
3 Subsequent to finding the considerable variation between clinics described above, latent  
4  
5 class analysis was undertaken which identified three clusters of clinics (columns labelled 1, 2  
6  
7 and 3 in Table 5) which appear to represent a gradient in the markers of staff employment  
8  
9 stability. Cluster 1 is distinguished by a comparatively high mean number of staff exits but  
10  
11 also high variance in staff exits over time. This cluster has levels of average stability and  
12  
13 turnover that are in between those of Clusters 2 and 3. The second cluster has relatively  
14  
15 lower average and variance in staff exits, lower turnover and higher stability scores, hence  
16  
17 represents a hypothetically desirable group of clinics on average. The third cluster lies  
18  
19 between the first and second with lower mean and variance over time in staff exits than  
20  
21 Cluster 1 but has the highest turnover (indicative of smaller clinic size than Cluster 1 clinics),  
22  
23 the lowest stability and the highest proportional use of agency nurses, hence represents a  
24  
25 hypothetically undesirable group of clinics on average. There was overall less variation in  
26  
27 the mean proportion of agency nurses between clusters, with Cluster 2 having the lowest  
28  
29 proportion (17%) and Cluster 3 the highest (20%).  
30  
31  
32  
33  
34  
35  
36  
37  
38  
39

40 [Insert Table 6 about here]  
41  
42  
43  
44  
45

46 In general, there was not clinically meaningful and statistically significant variance in quality  
47  
48 indicator achievement between clusters (Table 6). Exceptions were lower use of Angiotensin  
49  
50 Converting Enzyme Inhibitor) and/or Angiotensin Receptor Blocker in Cluster 1 than Clusters  
51  
52 2 and 3 and higher rates of childhood anaemia in clinics in cluster 1 than in Clusters 2 and 3.  
53  
54 However in general the clusters are not differentiated with respect to indicators of quality  
55  
56 of care.  
57  
58  
59  
60

1  
2  
3 [Insert Table 7 about here]  
4  
5  
6  
7

8 Table 7 presents the mean association effect sizes across clusters according to the markers of staff  
9 employment stability and quality indicator combinations. In general clusters did not differ  
10 substantially or in a statistically significantly way with respect to strength/direction of the  
11 association. Exceptions included the association between stability and antenatal care at any time  
12 during pregnancy for which Cluster 2 reported more negative association; and pap smears at two  
13 years, for which Cluster 1 reported a positive association with stability whereas the other clusters  
14 reported no association.  
15  
16  
17  
18  
19  
20  
21  
22  
23  
24  
25  
26

## 27 **DISCUSSION**

28  
29  
30  
31  
32 Overall, minimal evidence of the hypothesised negative effects of increased turnover,  
33 decreased stability and increased reliance on temporary staff on quality of care was found.  
34  
35 In a small number of cases there were statistically significant associations in the  
36 hypothesised direction, a smaller number in a direction opposite to that hypothesised, but  
37 the majority yielded overall association measures (slopes) that were close to zero and failed  
38 to reach statistical significance (Table 2). While these findings could indicate that the  
39 hypothesised negative effects on quality of care are not supported by the evidence, there  
40 are several pointers that on-the-ground reality might not be that simple. First, while the  
41 overall estimates of association were all close to zero, there was substantial variation in the  
42 clinic-specific estimates, meaning that in some clinics quality was negatively associated with  
43 higher turnover, lower stability and lower use of short-term staff but in other clinics quality  
44 was unrelated or even positively related with these measures. The latter, counter-  
45  
46  
47  
48  
49  
50  
51  
52  
53  
54  
55  
56  
57  
58  
59  
60

1  
2  
3 hypothesised results might reflect random chance but they might also reflect clinic-specific  
4  
5 factors that counter the potential negative effects of decreased workforce stability,  
6  
7 increased turnover and increased use of short-term staff. A clustering of clinics based on  
8  
9 markers of staff employment stability failed to yield clinic groupings that explain the  
10  
11 between-clinic variation in associations (Table 7).  
12  
13

14  
15  
16 Alternate explanations of this variability might include a number of unquantified local  
17  
18 factors. For example, a competent clinic manager may be able to manage an unstable  
19  
20 workforce more effectively, thus mitigating the deficits that might otherwise have  
21  
22 occurred.<sup>35</sup> A robust Continual Quality Improvement program, visiting outreach health  
23  
24 staff, and clinic-level data reports may also counter any negative effects of employment  
25  
26 instability. Heavy reliance on short-term agency nurses might not be as detrimental as  
27  
28 hypothesised if some of these nurses return repeatedly to the same clinic or group of clinics,  
29  
30 and thus have local knowledge and long-standing relationships with residents which  
31  
32 facilitate continuity of care.<sup>36</sup> Or it may be that in some instances skilled agency nurses  
33  
34 enable resident RANs to take planned annual leave or undertake professional development,  
35  
36 rather than having a stream of inexperienced or poorly prepared agency nurses filling  
37  
38 longstanding vacancies at short notice.<sup>35</sup> In these ways, the administrative data might  
39  
40 indicate greater instability in the workforce than is actually experienced in terms of  
41  
42 continuity of care on the ground.  
43  
44  
45  
46  
47  
48

49  
50 Other factors that cannot be readily quantified that may contribute to the observed  
51  
52 variability include both the clinical and cultural competence of short-term health staff.<sup>35</sup> The  
53  
54 acceptability of the service to local residents is not only a function of the cultural  
55  
56 competence of non-Aboriginal or Torres Strait Islander staff, but also the presence of  
57  
58  
59  
60

1  
2  
3 Aboriginal staff, both clinical and non-clinical staff such as administrative officers, drivers  
4  
5 and groundsmen. These non-clinical staff are often long-serving and knowledgeable. Their  
6  
7 varying numbers across clinics may also help to explain the variability in the results  
8  
9 presented.<sup>35,37</sup>  
10  
11  
12  
13  
14  
15

## 16 **LIMITATIONS**

17  
18  
19 This study relied on territory-wide, routinely collected data to test its hypotheses rather  
20  
21 than collecting data prospectively using definitions and in formats that might have been  
22  
23 optimal for the purpose. The routine collection is used to guide service delivery and is  
24  
25 routinely reported at both NT and national levels. Its use for this study was not only guided  
26  
27 by feasibility but also to demonstrate the wider utility of the collection. Nonetheless the use  
28  
29 of the existing collection contributed to both measurement noise and definitional  
30  
31 challenges which made underlying associations less evident. For example, the use of agency  
32  
33 nurses in NT DoH remote clinics are recorded either in payroll data or in expenditure data,  
34  
35 depending on the payment arrangements that NT DoH has with each nursing agency. For  
36  
37 this study agency nurses recorded in the NT DoH payroll were included in turnover and  
38  
39 stability figures, whereas work by agency nurses recorded in expenditure data were  
40  
41 included in the estimation of agency nurse proportion. A further limitation was that it was  
42  
43 not possible to allocate staff working in a supernumerary capacity in a remote health clinic  
44  
45 to that clinic as this wasn't recorded in the administrative records used. Finally, the  
46  
47 research relates to a very specific context of government-provided PHC in small, remote NT  
48  
49 communities and the findings may not be generalisable to other health systems, service  
50  
51 models, geographical settings or study populations.  
52  
53  
54  
55  
56  
57  
58  
59  
60

## CONCLUSION

Two very clear findings emerge from this study. One is that decreased staff stability and increased use of short-term agency nurses is associated with deficits in quality of care for some clinics but not for others. Understanding the reasons for this variation would significantly aid the provision of high quality clinical care in remote Australia. The second is that the data needed to understand this important question of quality of care, and other related questions, are challenging to obtain. The public interest would be served by the development of health information systems and streamlined processes that facilitate analyses such as those undertaken here.

## Acknowledgements

The authors thank the Northern Territory Department of Health staff who provided technical assistance in accessing and interpreting departmental personnel, primary health care, hospitalisation and financial data. The authors also acknowledge and sincerely thank all staff working in the remote NT communities, particularly the clinic managers.

## Contributors

MPJ contributed to the design of the study and led analysis and drafting of the paper. JW led the conceptualisation and overall study design and contributed to drafting the paper. JSH contributed to the conceptualisation and design of the study and assisted with drafting the manuscript. SG, MR and DJR contributed to the design of the study and assisted with drafting the manuscript. All authors read and approved the final manuscript.

## Funding statement

1  
2  
3 This work was supported by the Australian Research Council's Discovery Projects funding  
4  
5 scheme (project number DP150102227). The funder had no input in to the design, conduct  
6  
7 and reporting of this analysis.  
8  
9

### 10 11 12 **Competing interests statement**

13  
14  
15 None declared.  
16  
17

### 18 19 20 **Patient consent for publication**

21  
22 Not required.  
23  
24  
25

### 26 27 28 **Ethics approval**

29  
30 Ethics approval was received from the Human Research Ethics Committee of the Northern  
31  
32 Territory Department of Health and Menzies School of Health Research (2015-2363).  
33  
34

### 35 36 37 **Patient and public involvement**

38  
39 It was not appropriate or possible to involve patients or the public in the design, or conduct,  
40  
41 or reporting, or dissemination plans of the research reported here.  
42  
43  
44

### 45 46 47 **Provenance and peer review**

48  
49 Not commissioned; externally peer reviewed.  
50  
51

### 52 53 54 **Data sharing statement**

1  
2  
3 The datasets generated and analysed during the current study are not publicly available due  
4  
5 to identifiability of remote primary health care providers and the need to protect their  
6  
7  
8 privacy.  
9

### 10 11 12 13 **Author note**

14  
15  
16 Original protocol for the study: The original protocol for the study is published and available  
17  
18 (open access): Wakerman J, Humphreys JS, Bourke L, Dunbar T, Jones M, Carey T, et al.  
19  
20 Assessing the impact and cost of short-term health workforce in remote Indigenous  
21  
22 communities in Australia: a mixed methods study protocol. JMIR research protocols.  
23  
24 2016;5(4):e135.  
25  
26  
27  
28  
29  
30  
31  
32  
33  
34  
35  
36  
37  
38  
39  
40  
41  
42  
43  
44  
45  
46  
47  
48  
49  
50  
51  
52  
53  
54  
55  
56  
57  
58  
59  
60

## References

1. Australian Government. The Australian continent. 2019. <https://www.australia.gov.au/about-australia/our-country/the-australian-continent> (accessed 11 Feb 2019).
2. ABS. ABS 2020 Regional Population Growth, Australia, 2018-19. Canberra: Australian Bureau of Statistics, 2020.
3. Australian Bureau of Statistics. ABS 2011 Census of Population and Housing. Data generated using ABS TableBuilder. Canberra: ABS; 2011.
4. Australian Institute of Health and Welfare. Australian Burden of Disease Study: fatal burden of disease in Aboriginal and Torres Strait Islander people 2010. Australian Burden of Disease Study series no. 2. Cat. no. BOD 2. Canberra: AIHW; 2015.
5. Georges N, Guthridge SL, Li SQ, Condon JR, Barnes T, Zhao Y. Progress in closing the gap in life expectancy at birth for Aboriginal people in the Northern Territory, 1967-2012. *Med J Aust* 2017; **207**(1): 25-30.
6. Maarsingh OR, Henry Y, van de Ven PM, Deeg DJ. Continuity of care in primary care and association with survival in older people: a 17-year prospective cohort study. *Br J Gen Pract* 2016; **66**(649): e531-e9.
7. Minore B, Boone M, Katt M, Kinch P, Birch S, Mushquash C. The effects of nursing turnover on continuity of care in isolated First Nation communities. *CJNR (Canadian Journal of Nursing Research)* 2005; **37**(1): 86-101.
8. Menec VH, Sirski M, Attawar D, Katz A. Does continuity of care with a family physician reduce hospitalizations among older adults? *J Health Serv Res Policy* 2006; **11**(4): 196-201.
9. Barker I, Steventon A, Deeny S. Continuity of care in general practice is associated with fewer ambulatory care sensitive hospital admissions: a cross-sectional study of routinely collected, person-level data. *Clin Med (Lond)* 2017; **17**(Suppl 3): s16.
10. Mason J. Review of Australian government health workforce programs. Canberra: Australian Government Department of Health, 2013.
11. Gibbon P, Hales J. Review of the rural retention program. Final Report. Kent Town SA: Australian Government Department of Health and Ageing; 2006.
12. Walters L, McGrail M, Carson D, et al. Where to next for rural general practice policy and research in Australia? *Med J Aust* 2017; **207**(2): 56-8.
13. Wakerman J, Curry R, McEldowney R. Fly in/fly out health services: The panacea or the problem? *Rural Remote Health* 2012; **12**: 2268.
14. Guerin P, Guerin B. Social effects of fly-in-fly-out and drive-in-drive-out services for remote indigenous communities. *Australian Community Psychologist* 2009; **21**(2): 8-23.
15. van Walraven C, Oake N, Jennings A, Forster AJ. The association between continuity of care and outcomes: a systematic and critical review. *J Eval Clin Pract* 2010; **16**(5): 947-56.
16. Rowley KG, O'Dea K, Anderson I, et al. Lower than expected morbidity and mortality for an Australian Aboriginal population: 10-year follow-up in a decentralised community. *Med J Aust* 2008; **188**(5): 283-7.



17. Thomas SL, Zhao Y, Guthridge SL, Wakerman J. The cost-effectiveness of primary care for Indigenous Australians with diabetes living in remote Northern Territory communities. *Med J Aust* 2014; **200**(11): 658-62.
18. Zhao Y, Wright J, Guthridge S, Lawton P. The relationship between number of primary health care visits and hospitalisations: evidence from linked clinic and hospital data for remote Indigenous Australians. *BMC Health Serv Res* 2013; **13**: 466.
19. Saint-Pierre C, Prieto F, Herskovic V, Sepúlveda M. Relationship between Continuity of Care in the Multidisciplinary Treatment of Patients with Diabetes and Their Clinical Results. *Applied Sciences* 2019; **9**(2): 268.
20. Lustman A, Comaneshter D, Vinker S. Interpersonal continuity of care and type two diabetes. *Prim Care Diabetes* 2016; **10**(3): 165-70.
21. Younge R, Jani B, Rosenthal D, Lin SX. Does continuity of care have an effect on diabetes quality measures in a teaching practice in an urban underserved community? *J Health Care Poor Underserved* 2012; **23**(4): 1558-65.
22. Gulliford MC, Morgan M, Naithani S. Continuity of care and intermediate outcomes of type 2 diabetes mellitus. *Fam Pract* 2007; **24**(3): 245-51.
23. Flach SD, McCoy KD, Vaughn TE, Ward MM, Bootsmiller BJ, Doebbeling BN. Does patient-centered care improve provision of preventive services? *J Gen Intern Med* 2004; **19**(10): 1019-26.
24. Busbridge MJ, Smith A. Fly in/fly out health workers: a barrier to quality in health care. *Rural Remote Health* 2015; **15**(2): 3339.
25. Northern Territory Government Department of Health. Indicator definition: Full Time Equivalents v1.0. Darwin: NTG Department of Health, 2015.
26. Burgess CP, Sinclair G, Ramjan M, Coffey PJ, Connors CM, Katekar LV. Strengthening cardiovascular disease prevention in remote indigenous communities in Australia's Northern Territory. *Heart Lung Circ* 2015; **24**(5): 450-7.
27. Russell DJ, Humphreys JS, Wakerman J. How best to measure health workforce turnover and retention: Five key metrics. *Aust Health Rev* 2012; **36**(3): 290-5.
28. Northern Territory Department of Health. Remote Area Nurse safety: On-call after hours security. Darwin: NT Department of Health; 2016.
29. ABS. Technical Paper: Socio-Economic Indexes for Areas (SEIFA). Canberra: Australian Bureau of Statistics, 2018.
30. Australian Bureau of Statistics. 2011 Census QuickStats. 2013. [https://quickstats.censusdata.abs.gov.au/census\\_services/getproduct/census/2011/quickstat/0](https://quickstats.censusdata.abs.gov.au/census_services/getproduct/census/2011/quickstat/0) (accessed 21 June 2021).
31. Kish L. Survey Sampling. New York, London: John Wiley & Sons Inc.; 1965.
32. Hagenaars JA, McCutcheon AL. Applied latent class analysis. New York: Cambridge University Press; 2002.
33. Jiang MF, Tseng SS, Su CM. Two-phase clustering process for outliers detection. *Pattern Recognition Letters* 2001; **22**(6): 691-700.
34. Wang H, Shan H, Banerjee A. Bayesian cluster ensembles. *Statistical Analysis and Data Mining: The ASA Data Science Journal* 2011; **4**(1): 54-70.
35. Dunbar T, Bourke L, Murakami-Gold L. More than just numbers! Perceptions of remote area nurse staffing in Northern Territory Government health clinics. *Aust J Rural Health* 2019; **27**(3): 245-50.

1  
2  
3 36. Bourke L, Dunbar T, Murakami-Gold L. Discourses within the roles of Remote Area  
4 Nurses in Northern Territory (Australia) government-run health clinics. *Health Soc Care*  
5 *Community* 2020.

6  
7 37. Zhao Y, Russell DJ, Guthridge S, et al. Long-term trends in supply and sustainability of  
8 the health workforce in remote Aboriginal communities in the Northern Territory of  
9 Australia. *BMC Health Serv Res* 2017; **17**(1): 836.  
10  
11  
12  
13  
14  
15  
16  
17  
18  
19  
20  
21  
22  
23  
24  
25  
26  
27  
28  
29  
30  
31  
32  
33  
34  
35  
36  
37  
38  
39  
40  
41  
42  
43  
44  
45  
46  
47  
48  
49  
50  
51  
52  
53  
54  
55  
56  
57  
58  
59  
60

For peer review only

Table 1: Study independent variables

| Measure                 | Definition                                                                                                                                                           |
|-------------------------|----------------------------------------------------------------------------------------------------------------------------------------------------------------------|
| Turnover rate           | $= \frac{\text{total number of exits}^{\dagger} \text{ in defined period}}{\text{average number of employees in defined period}}$                                    |
| Stability rate          | $= \frac{\text{Number of employees at start of defined period who remain employed at end of defined period}}{\text{Number of employees at start of defined period}}$ |
| Agency nurse proportion | $= \frac{\text{Agency – employed nurse FTE}}{\text{Total FTE nurse positions}}$                                                                                      |

Table 2: Study dependent variables

| Indicator name                          | Definition                                                                                                                                                                                                                                                                                                         | Denominator Population                                                                          | Source of data |
|-----------------------------------------|--------------------------------------------------------------------------------------------------------------------------------------------------------------------------------------------------------------------------------------------------------------------------------------------------------------------|-------------------------------------------------------------------------------------------------|----------------|
| <b><i>Child and maternal health</i></b> |                                                                                                                                                                                                                                                                                                                    |                                                                                                 |                |
| First antenatal visit                   | Number and proportion of regular clients who attended a first antenatal visit (at any health service locality) <ol style="list-style-type: none"> <li>1. Before 13 weeks gestation</li> <li>2. At 20 weeks or more gestation</li> <li>3. Any antenatal visit</li> </ol>                                            | Resident women who gave birth to an Aboriginal or Torres Strait Islander baby                   | NT AHKPI       |
| Fully immunised children                | Number and proportion of Aboriginal or Torres Strait Islander children fully immunised at <ol style="list-style-type: none"> <li>1. 6 months to &lt; 1 year</li> <li>2. 1 year to &lt;2 years</li> <li>3. 2 years to &lt;6 years</li> <li>4. Any age and have received all age appropriate vaccinations</li> </ol> | Aboriginal or Torres Strait Islander resident children aged 6 months to <6 years                | NT AHKPI       |
| Anaemia test                            | Number and proportion of Aboriginal or Torres Strait Islander children who, in the past year have been tested for anaemia                                                                                                                                                                                          | Aboriginal or Torres Strait Islander resident children who are $\geq 6$ months old and <5 years | NT AHKPI       |

|                                                                              |                                                                                                                                                                                                                                  |                                                                                                                                                                |          |
|------------------------------------------------------------------------------|----------------------------------------------------------------------------------------------------------------------------------------------------------------------------------------------------------------------------------|----------------------------------------------------------------------------------------------------------------------------------------------------------------|----------|
| Anaemia result                                                               | Number and proportion of Aboriginal or Torres Strait Islander children who, in the past year have been found to be anaemic                                                                                                       | Aboriginal or Torres Strait Islander resident children who are $\geq 6$ months old and $< 5$ years                                                             | NT AHKPI |
| <b>Chronic Disease Management</b>                                            |                                                                                                                                                                                                                                  |                                                                                                                                                                |          |
| Glycated haemoglobin (HbA1c) test                                            | Number and proportion of Aboriginal or Torres Strait Islander resident clients aged 15 years and over with Type 2 Diabetes Mellitus who have had a glycated haemoglobin (HbA1c) test in the past 12 months.                      | Aboriginal or Torres Strait Islander resident clients aged $\geq 15$ years diagnosed with Type 2 Diabetes Mellitus                                             | TLR      |
| Glycated haemoglobin (HbA1c) result                                          | Number and proportion of Aboriginal or Torres Strait Islander clients with Type 2 Diabetes Mellitus and whose most recent glycated haemoglobin (HbA1c) measurement within the past 12 months is $\leq 8\%$ ( $\leq 86$ mmol/mol) | Aboriginal or Torres Strait Islander resident clients aged $\geq 15$ years diagnosed with Type 2 Diabetes Mellitus and had glycated haemoglobin (HbA1c) tested | TLR      |
| Angiotensin Converting Enzyme Inhibitor) and/or Angiotensin Receptor Blocker | Number and proportion of Aboriginal or Torres Strait Islander clients with Type 2 Diabetes Mellitus with albuminuria who are on Angiotensin Converting Enzyme Inhibitor) and/or an Angiotensin Receptor Blocker.                 | Aboriginal or Torres Strait Islander resident clients aged $\geq 15$ years diagnosed with Type 2 Diabetes Mellitus and albuminuria                             | TLR      |

|                          |                                                                                                                                                                                                                                             |                                                                                                          |          |
|--------------------------|---------------------------------------------------------------------------------------------------------------------------------------------------------------------------------------------------------------------------------------------|----------------------------------------------------------------------------------------------------------|----------|
| Non-smoking              | Number and proportion of Aboriginal or Torres Strait Islander clients who are ex- or never smokers of cigarettes                                                                                                                            | Aboriginal or Torres Strait Islander residents aged $\geq 15$ who have had their smoking status recorded | TLR      |
| <b>Preventive Health</b> |                                                                                                                                                                                                                                             |                                                                                                          |          |
| Pap smear tests          | Number and proportion of eligible Aboriginal or Torres Strait Islander women who have had at least one Pap smear test during the last: <ol style="list-style-type: none"> <li>1. 2 years</li> <li>2. 3 years</li> <li>3. 5 years</li> </ol> | Aboriginal or Torres Strait Islander resident women aged 20-69 inclusive                                 | NT AHKPI |
| Adult health check 15-55 | Number and proportion of Aboriginal or Torres Strait Islander clients who have had a full adult health check.                                                                                                                               | Aboriginal or Torres Strait Islander resident clients aged 15 years to < 55 years                        | TLR      |
| Adult health check 55+   | Number and proportion of Aboriginal or Torres Strait Islander clients who have had a full adult health check.                                                                                                                               | Aboriginal or Torres Strait Islander resident clients aged $\geq 55$ years                               | TLR      |

NTAHKPI Northern Territory Aboriginal Health Key Performance Indicator reports

TLR Traffic light reports

Table 3. Clinic characteristics averaged across 2011-2015

| Characteristics                                                | Mean | SD   | Min  | Max   | N  |
|----------------------------------------------------------------|------|------|------|-------|----|
| Markers of staff employment stability                          |      |      |      |       |    |
| Average annual head count                                      | 4.50 | 3.80 | 0.28 | 19.17 | 48 |
| Turnover rate                                                  | 0.07 | 0.03 | 0.00 | 0.18  | 48 |
| Stability rate                                                 | 0.40 | 0.14 | 0.00 | 0.77  | 48 |
| Agency nurse proportion                                        | 0.16 | 0.09 | 0.00 | 0.42  | 48 |
| <i>Quality indicators<sup>†</sup></i>                          |      |      |      |       |    |
| First antenatal visit<br>(1. before 13 weeks' gestation)       | 0.49 | 0.16 | 0.17 | 0.96  | 47 |
| First antenatal visit<br>(2. at or before 20 weeks' gestation) | 0.72 | 0.15 | 0.23 | 1.00  | 47 |
| First antenatal visit<br>(3. any antenatal care)               | 0.98 | 0.04 | 0.80 | 1.00  | 47 |
| Fully immunised children (6-11 months)                         | 0.88 | 0.08 | 0.63 | 1.00  | 47 |
| Fully immunised children (12-23 months)                        | 0.83 | 0.12 | 0.54 | 1.00  | 47 |
| Fully immunised children (24-71 months)                        | 0.80 | 0.08 | 0.58 | 0.935 | 47 |
| Fully immunised children (any age)                             | 0.81 | 0.08 | 0.60 | 0.93  | 47 |
| Anaemia test                                                   | 0.78 | 0.09 | 0.50 | 0.90  | 47 |
| Anaemia result                                                 | 0.17 | 0.05 | 0.06 | 0.30  | 47 |
| Glycated haemoglobin (HbA1c) test                              | 0.92 | 0.04 | 0.84 | 1.00  | 46 |
| Glycated haemoglobin (HbA1c) result ≤8%                        | 0.48 | 0.10 | 0.23 | 0.71  | 47 |

|                                                                                 |      |      |      |      |    |
|---------------------------------------------------------------------------------|------|------|------|------|----|
| Angiotensin Converting Enzyme Inhibitor)<br>and/or Angiotensin Receptor Blocker | 0.84 | 0.10 | 0.59 | 1.00 | 46 |
| Non-smoking                                                                     | 0.52 | 0.14 | 0.24 | 0.73 | 47 |
| Adult health check 55+                                                          | 0.34 | 0.12 | 0.09 | 0.72 | 47 |
| Adult health check 15-54                                                        | 0.42 | 0.15 | 0.11 | 0.75 | 47 |
| Pap smear 2yrs                                                                  | 0.50 | 0.12 | 0.20 | 0.79 | 47 |
| Pap smear 3yrs                                                                  | 0.40 | 0.07 | 0.18 | 0.55 | 47 |
| Pap smear 5yrs                                                                  | 0.46 | 0.06 | 0.24 | 0.56 | 47 |

†One of the 48 health clinics did not independently report on any quality indicators during the study period. A second health clinic did not report on Glycated haemoglobin tests and Angiotensin Converting Enzyme Inhibitor and/or Angiotensin Receptor Blocker quality indicators.



1  
2  
3  
4  
5  
6  
7  
8  
9  
10  
11  
12  
13  
14  
15  
16  
17  
18  
19  
20  
21  
22  
23  
24  
25  
26  
27  
28  
29  
30  
31  
32  
33  
34  
35  
36  
37  
38  
39  
40  
41  
42  
43  
44  
45  
46  
47  
48  
49  
50  
51  
52  
53  
54  
55  
56  
57  
58  
59  
60

**Table 4. Associations between markers of staff employment stability and quality indicators**

For peer review only

| Indicator                                                | Staffing     | Slope  | Lower  | Upper  | p-value | ASD  |
|----------------------------------------------------------|--------------|--------|--------|--------|---------|------|
|                                                          | measure      |        |        |        |         |      |
| First antenatal visit (before 13 weeks' gestation)       | Turnover     | 0.023  | -0.010 | 0.056  | 0.2     | 0.33 |
|                                                          | Agency nurse | -0.060 | -0.178 | 0.059  | 0.3     | 1.03 |
|                                                          | Stability    | 0.001  | -0.113 | 0.115  | >0.9    | 0.55 |
| First antenatal visit (at or before 20 weeks' gestation) | Turnover     | 0.026  | -0.018 | 0.070  | 0.3     | 0.27 |
|                                                          | Agency nurse | -0.088 | -0.231 | 0.056  | 0.2     | 1.10 |
|                                                          | Stability    | 0.008  | -0.091 | 0.107  | 0.9     | 0.44 |
| First antenatal visit (any antenatal care)               | Turnover     | -0.001 | -0.006 | 0.004  | 0.7     | 0.13 |
|                                                          | Agency nurse | 0.015  | -0.028 | 0.058  | 0.5     | 0.38 |
|                                                          | Stability    | 0.007  | -0.015 | 0.030  | 0.5     | 0.27 |
| Fully immunised children (6-11 months)                   | Turnover     | -0.061 | -0.119 | -0.002 | 0.04    | 0.36 |
|                                                          | Agency nurse | 0.022  | -0.135 | 0.179  | 0.8     | 1.21 |
|                                                          | Stability    | 0.011  | -0.073 | 0.095  | 0.8     | 0.51 |
| Fully immunised children (12-23 months)                  | Turnover     | -0.001 | -0.017 | 0.015  | 0.9     | 0.16 |
|                                                          | Agency nurse | -0.049 | -0.155 | 0.057  | 0.4     | 0.63 |
|                                                          | Stability    | -0.017 | -0.062 | 0.028  | 0.5     | 0.25 |
| Fully immunised children (24-71 months)                  | Turnover     | -0.012 | -0.030 | 0.006  | 0.2     | 0.11 |
|                                                          | Agency nurse | -0.056 | -0.122 | 0.009  | 0.09    | 0.43 |
|                                                          | Stability    | 0.002  | -0.034 | 0.037  | 0.9     | 0.23 |
| Fully immunised children                                 | Turnover     | 0.002  | -0.008 | 0.013  | 0.7     | 0.10 |

|                                                                                    |              |        |        |        |      |      |
|------------------------------------------------------------------------------------|--------------|--------|--------|--------|------|------|
| (any age)                                                                          | Agency nurse | -0.061 | -0.118 | -0.005 | 0.03 | 0.38 |
|                                                                                    | Stability    | 0.004  | -0.025 | 0.033  | 0.8  | 0.19 |
| Anaemia result                                                                     | Turnover     | 0.011  | -0.025 | 0.048  | 0.5  | 0.10 |
|                                                                                    | Agency nurse | 0.019  | -0.055 | 0.093  | 0.6  | 0.62 |
|                                                                                    | Stability    | 0.042  | -0.008 | 0.092  | 0.1  | 0.24 |
| Anaemia test                                                                       | Turnover     | 0.017  | 0.000  | 0.034  | 0.06 | 0.11 |
|                                                                                    | Agency nurse | 0.023  | -0.046 | 0.092  | 0.5  | 0.55 |
|                                                                                    | Stability    | 0.002  | -0.041 | 0.045  | >0.9 | 0.32 |
| Glycated haemoglobin<br>(HbA1c) test                                               | Turnover     | -0.006 | -0.024 | 0.012  | 0.5  | 0.11 |
|                                                                                    | Agency nurse | -0.003 | -0.076 | 0.070  | 0.9  | 0.57 |
|                                                                                    | Stability    | 0.015  | -0.015 | 0.044  | 0.3  | 0.20 |
| Glycated haemoglobin<br>(HbA1c) result                                             | Turnover     | -0.006 | -0.022 | 0.010  | 0.5  | 0.24 |
|                                                                                    | Agency nurse | -0.037 | -0.026 | 0.101  | 0.3  | 0.27 |
|                                                                                    | Stability    | -0.036 | -0.066 | -0.007 | 0.02 | 0.26 |
| Angiotensin Converting<br>Enzyme Inhibitor) and/or<br>Angiotensin Receptor Blocker | Turnover     | -0.025 | -0.060 | 0.010  | 0.2  | 0.24 |
|                                                                                    | Agency nurse | 0.053  | -0.104 | 0.210  | 0.5  | 0.35 |
|                                                                                    | Stability    | 0.044  | -0.010 | 0.097  | 0.1  | 0.34 |
| Non-smoking                                                                        | Turnover     | -0.007 | -0.019 | 0.005  | 0.3  | 0.28 |
|                                                                                    | Agency nurse | 0.005  | -0.043 | 0.053  | 0.8  | 0.28 |
|                                                                                    | Stability    | -0.005 | -0.033 | 0.023  | 0.7  | 0.29 |
| Pap smear 2yrs                                                                     | Turnover     | -0.007 | -0.019 | 0.005  | 0.2  | 0.09 |
|                                                                                    | Agency nurse | -0.058 | -0.127 | 0.011  | 0.1  | 0.47 |
|                                                                                    | Stability    | 0.006  | -0.038 | 0.051  | 0.8  | 0.20 |

|                               |              |        |        |        |       |      |
|-------------------------------|--------------|--------|--------|--------|-------|------|
| Pap smear 3yrs                | Turnover     | -0.021 | -0.038 | -0.004 | 0.01  | 0.18 |
|                               | Agency nurse | -0.053 | -0.137 | 0.030  | 0.2   | 0.73 |
|                               | Stability    | 0.050  | -0.030 | 0.130  | 0.2   | 0.51 |
| Pap smear 5yrs                | Turnover     | -0.023 | -0.041 | -0.005 | 0.01  | 0.20 |
|                               | Agency nurse | -0.048 | -0.155 | 0.059  | 0.4   | 0.83 |
|                               | Stability    | 0.057  | -0.030 | 0.143  | 0.2   | 0.59 |
| Adult health check aged 15-55 | Turnover     | 0.031  | -0.003 | 0.066  | 0.08  | 0.12 |
|                               | Agency nurse | 0.129  | -0.036 | 0.294  | 0.1   | 0.59 |
|                               | Stability    | -0.056 | -0.119 | 0.006  | 0.08  | 0.38 |
| Adult health check aged 55+   | Turnover     | 0.024  | -0.040 | 0.087  | 0.5   | 0.21 |
|                               | Agency nurse | 0.265  | 0.073  | 0.457  | 0.007 | 1.01 |
|                               | Stability    | -0.027 | -0.145 | 0.091  | 0.7   | 0.56 |

<sup>A</sup>Standard deviation (SD) of clinic-specific estimates of association

Table 5. Cluster characteristics

|                                                                      | Mean |      |      | SD   |      |      | Clinic-months |     |     |
|----------------------------------------------------------------------|------|------|------|------|------|------|---------------|-----|-----|
|                                                                      | 1    | 2    | 3    | 1    | 2    | 3    | 1             | 2   | 3   |
| Cluster Number                                                       | 1    | 2    | 3    | 1    | 2    | 3    | 1             | 2   | 3   |
| Number of clinics                                                    | 9    | 16   | 19   | 9    | 16   | 19   |               |     |     |
| <i>Mean<sup>A</sup></i>                                              |      |      |      |      |      |      |               |     |     |
| Number of staff exits                                                | 2.20 | 0.74 | 0.79 | 2.39 | 1.02 | 0.99 | 167           | 297 | 350 |
| Turnover rate                                                        | 0.22 | 0.16 | 0.29 | 0.22 | 0.23 | 0.39 | 167           | 297 | 347 |
| Stability rate                                                       | 0.46 | 0.64 | 0.43 | 0.11 | 0.14 | 0.12 | 203           | 361 | 426 |
| Agency nurse proportion                                              | 0.19 | 0.17 | 0.20 | 0.12 | 0.14 | 0.19 | 167           | 271 | 346 |
| <i>SD<sup>A</sup></i>                                                |      |      |      |      |      |      |               |     |     |
| Staff exits                                                          | 2.18 | 0.88 | 0.95 | 0.82 | 0.36 | 0.31 | 203           | 361 | 426 |
| Turnover rate                                                        | 0.14 | 0.19 | 0.33 | 0.04 | 0.06 | 0.06 | 203           | 361 | 426 |
| Stability rate                                                       | 0.21 | 0.21 | 0.37 | 0.08 | 0.08 | 0.12 | 203           | 361 | 426 |
| Agency nurse proportion                                              | 0.10 | 0.13 | 0.17 | 0.03 | 0.04 | 0.05 | 203           | 339 | 426 |
| <i>Traits<sup>B</sup></i>                                            |      |      |      |      |      |      |               |     |     |
| Index of Relative<br>Socio-economic<br>Advantage and<br>Disadvantage | 652  | 746  | 709  | 84   | 122  | 137  | 9             | 16  | 19  |
| Google distance to<br>Darwin or Alice Springs                        | 313  | 267  | 332  | 222  | 167  | 220  | 9             | 16  | 19  |
| Predominantly non-<br>Aboriginal: % (count)                          | 0.0  | 6.3  | 15.8 | 0    | 1    | 3    | 9             | 16  | 19  |

<sup>A</sup>Based on multiple measurements per clinic to reflect variation in these traits over time within clinics

<sup>B</sup>Based on a single measurement per clinic since this trait does not vary within each clinic over the time period studied

1  
2  
3  
4  
5  
6  
7  
8  
9  
10  
11  
12  
13  
14  
15  
16  
17  
18  
19  
20  
21  
22  
23  
24  
25  
26  
27  
28  
29  
30  
31  
32  
33  
34  
35  
36  
37  
38  
39  
40  
41  
42  
43  
44  
45  
46  
47  
48  
49  
50  
51  
52  
53  
54  
55  
56  
57  
58  
59  
60

For peer review only

Table 6. Variation in indicators across clusters

|                                                                                       | Mean         |      |      |         | SD           |      |      |         |
|---------------------------------------------------------------------------------------|--------------|------|------|---------|--------------|------|------|---------|
|                                                                                       | Clusters (3) |      |      | Overall | Clusters (3) |      |      | Overall |
|                                                                                       | 1            | 2    | 3    |         | 1            | 2    | 3    |         |
| <b>First antenatal visit by 13 weeks</b>                                              | 0.50         | 0.49 | 0.48 | 0.49    | 0.10         | 0.13 | 0.15 | 0.13    |
| <b>First antenatal visit by 20 weeks</b>                                              | 0.74         | 0.75 | 0.70 | 0.72    | 0.06         | 0.14 | 0.15 | 0.14    |
| <b>First antenatal visit anytime</b>                                                  | 0.98         | 0.98 | 0.98 | 0.98    | 0.01         | 0.06 | 0.03 | 0.04    |
| <b>Child immunisation 6-11m</b>                                                       | 0.86         | 0.90 | 0.89 | 0.89    | 0.07         | 0.08 | 0.07 | 0.08    |
| <b>Child immunisation 12-23m</b>                                                      | 0.84         | 0.84 | 0.87 | 0.85    | 0.10         | 0.12 | 0.11 | 0.11    |
| <b>Child immunisation 24-71m</b>                                                      | 0.82         | 0.78 | 0.81 | 0.80    | 0.09         | 0.09 | 0.07 | 0.08    |
| <b>Child immunisation (all)</b>                                                       | 0.83         | 0.80 | 0.82 | 0.81    | 0.08         | 0.09 | 0.06 | 0.08    |
| <b>Anaemia test</b>                                                                   | 0.81         | 0.79 | 0.79 | 0.79    | 0.06         | 0.06 | 0.09 | 0.07    |
| <b>Anaemia result **</b>                                                              | 0.21         | 0.16 | 0.16 | 0.17    | 0.03         | 0.06 | 0.06 | 0.06    |
| <b>Glycated haemoglobin (HbA1c) test</b>                                              | 0.90         | 0.93 | 0.93 | 0.92    | 0.04         | 0.04 | 0.04 | 0.04    |
| <b>Glycated haemoglobin (HbA1c) result</b>                                            | 0.48         | 0.50 | 0.48 | 0.49    | 0.09         | 0.07 | 0.13 | 0.10    |
| <b>Angiotensin Converting Enzyme Inhibitor) and/or Angiotensin Receptor Blocker**</b> | 0.74         | 0.84 | 0.88 | 0.84    | 0.11         | 0.05 | 0.08 | 0.09    |
| <b>Non-smoking</b>                                                                    | 0.49         | 0.52 | 0.53 | 0.52    | 0.14         | 0.13 | 0.15 | 0.14    |
| <b>Pap smear 2 years</b>                                                              | 0.51         | 0.52 | 0.50 | 0.51    | 0.12         | 0.10 | 0.12 | 0.11    |
| <b>Pap smear 3 years</b>                                                              | 0.40         | 0.42 | 0.41 | 0.41    | 0.07         | 0.07 | 0.07 | 0.07    |
| <b>Pap smear 5 years</b>                                                              | 0.45         | 0.47 | 0.46 | 0.46    | 0.05         | 0.05 | 0.05 | 0.05    |
| <b>Adult health check aged 15-54</b>                                                  | 0.31         | 0.34 | 0.37 | 0.35    | 0.13         | 0.14 | 0.12 | 0.12    |

|                                    | Mean         |      |      |         | SD           |      |      |         |
|------------------------------------|--------------|------|------|---------|--------------|------|------|---------|
|                                    | Clusters (3) |      |      | Overall | Clusters (3) |      |      | Overall |
|                                    | 1            | 2    | 3    |         | 1            | 2    | 3    |         |
| <b>Adult health check aged 55+</b> | 0.45         | 0.45 | 0.38 | 0.42    | 0.15         | 0.15 | 0.16 | 0.15    |

\*\* p<0.001

For peer review only



Table 7. Variation in mean associations across clusters

(Describe slopes by clusters-results 5.12.19.docx)

| Cluster                                                                      | Stability |        |        | Turnover |        |        | Agency nurse % |        |        | IV contrasts |   |   |
|------------------------------------------------------------------------------|-----------|--------|--------|----------|--------|--------|----------------|--------|--------|--------------|---|---|
|                                                                              | 1         | 2      | 3      | 1        | 2      | 3      | 1              | 2      | 3      | 1            | 2 | 3 |
| First antenatal visit 13wks                                                  | 0.176     | -0.012 | -0.110 | -0.058   | 0.061  | 0.013  | 0.029          | 0.002  | -0.289 |              |   |   |
| First antenatal visit 20wks                                                  | 0.180     | 0.065  | -0.046 | -0.020   | 0.023  | -0.091 | 0.101          | 0.084  | -0.261 |              |   |   |
| First antenatal visit any                                                    | -0.050    | -0.113 | 0.054  | -0.015   | 0.023  | -0.038 | -0.082         | 0.201  | -0.018 | *            |   |   |
| Immunisation 6-11m                                                           | 0.115     | -0.181 | 0.026  | -0.155   | 0.011  | 0.117  | 0.087          | -0.263 | 0.304  |              |   |   |
| Immunisation 12-23m                                                          | 0.083     | 0.113  | -0.079 | 0.002    | 0.012  | 0.039  | 0.075          | -0.106 | 0.362  |              |   |   |
| Immunisation 24-71m                                                          | 0.114     | 0.107  | -0.002 | 0.057    | 0.039  | -0.005 | -0.174         | -0.303 | -0.117 |              |   |   |
| Immunisation overall                                                         | 0.128     | 0.098  | -0.008 | 0.031    | 0.034  | -0.010 | -0.106         | -0.242 | -0.016 |              |   |   |
| Anaemia test                                                                 | 0.162     | 0.027  | 0.107  | -0.000   | 0.008  | -0.032 | -0.050         | 0.034  | 0.050  |              |   |   |
| Anaemia result                                                               | -0.011    | -0.023 | 0.065  | -0.016   | -0.001 | 0.006  | -0.032         | 0.118  | 0.142  |              |   |   |
|                                                                              |           |        |        |          |        |        |                |        |        |              |   |   |
| Glycated haemoglobin (HbA1c) test                                            | 0.115     | -0.467 | 0.152  | 0.311    | 0.050  | -0.033 | 0.298          | -0.392 | -0.352 |              |   |   |
| Glycated haemoglobin (HbA1c) result                                          | -0.060    | 0.048  | 0.233  | -0.078   | 0.014  | 0.039  | -0.020         | -0.183 | -0.060 |              |   |   |
| Angiotensin Converting Enzyme Inhibitor) and/or Angiotensin Receptor Blocker | -1.048    | -0.015 | 0.000  | -0.615   | -0.257 | -0.046 | 0.298          | -0.392 | -0.352 |              |   |   |
| Non-smoking                                                                  | 0.067     | 0.012  | -0.017 | 0.024    | 0.037  | -0.019 | -0.021         | 0.002  | 0.122  |              |   |   |
| Pap smear 2yrs                                                               | 0.173     | -0.015 | -0.016 | -0.037   | 0.003  | 0.024  | -0.086         | -0.101 | -0.061 | *            |   |   |
| Pap smear 3yrs                                                               | -0.331    | -0.041 | -0.012 | -0.084   | 0.061  | -0.052 | -0.070         | -0.382 | 0.054  |              |   |   |

| Cluster                  | Stability |        |        | Turnover |        |        | Agency nurse % |        |        | IV contrasts |   |   |
|--------------------------|-----------|--------|--------|----------|--------|--------|----------------|--------|--------|--------------|---|---|
|                          | 1         | 2      | 3      | 1        | 2      | 3      | 1              | 2      | 3      | 1            | 2 | 3 |
| Pap smear 5yrs           | -0.371    | -0.065 | 0.017  | -0.086   | 0.061  | -0.058 | -0.031         | -0.385 | 0.055  |              |   |   |
| Adult health check 15-54 | -0.220    | -0.009 | -0.229 | -0.464   | -0.278 | -0.124 | 0.733          | 0.077  | -0.098 |              |   |   |
| Adult health check 55+   | -0.478    | 0.218  | -0.382 | -0.403   | -0.169 | -0.126 | 2.825          | 0.310  | 0.315  |              |   |   |

\*  $p < 0.05$

For peer review only

1  
2  
3 Figure 1. Distribution of clinic-specific associations between proportional use of agency  
4  
5  
6 nurses and antenatal care quality of care indicators  
7  
8  
9  
10  
11  
12  
13  
14  
15  
16  
17  
18  
19  
20  
21  
22  
23  
24  
25  
26  
27  
28  
29  
30  
31  
32  
33  
34  
35  
36  
37  
38  
39  
40  
41  
42  
43  
44  
45  
46  
47  
48  
49  
50  
51  
52  
53  
54  
55  
56  
57  
58  
59  
60

For peer review only

1  
2  
3  
4  
5  
6  
7  
8  
9  
10  
11  
12  
13  
14  
15  
16  
17  
18  
19  
20  
21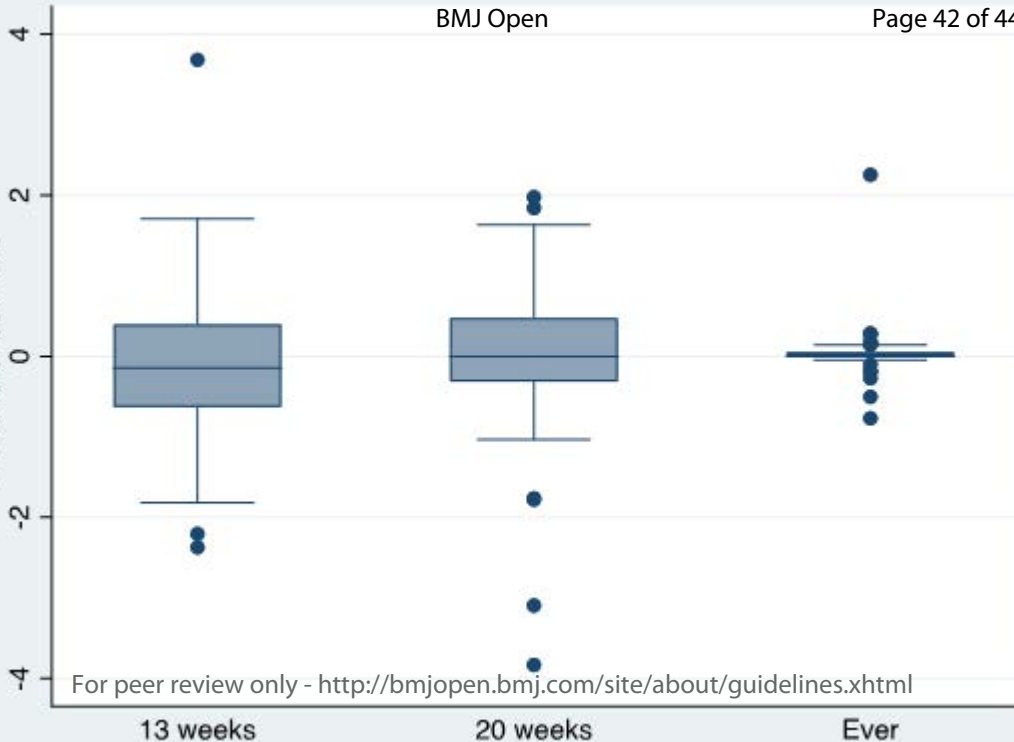

**STROBE 2007 (v4) Statement—Checklist of items that should be included in reports of *cohort studies***

| Section/Topic                | Item # | Recommendation                                                                                                                                                                       | Reported on page #          |
|------------------------------|--------|--------------------------------------------------------------------------------------------------------------------------------------------------------------------------------------|-----------------------------|
| <b>Title and abstract</b>    | 1      | (a) Indicate the study's design with a commonly used term in the title or the abstract                                                                                               | 1                           |
|                              |        | (b) Provide in the abstract an informative and balanced summary of what was done and what was found                                                                                  | 3-4                         |
| <b>Introduction</b>          |        |                                                                                                                                                                                      |                             |
| Background/rationale         | 2      | Explain the scientific background and rationale for the investigation being reported                                                                                                 | 5-7                         |
| Objectives                   | 3      | State specific objectives, including any prespecified hypotheses                                                                                                                     | 7                           |
| <b>Methods</b>               |        |                                                                                                                                                                                      |                             |
| Study design                 | 4      | Present key elements of study design early in the paper                                                                                                                              | 7                           |
| Setting                      | 5      | Describe the setting, locations, and relevant dates, including periods of recruitment, exposure, follow-up, and data collection                                                      | 7                           |
| Participants                 | 6      | (a) Give the eligibility criteria, and the sources and methods of selection of participants. Describe methods of follow-up                                                           | 8                           |
|                              |        | (b) For matched studies, give matching criteria and number of exposed and unexposed                                                                                                  | n/a                         |
| Variables                    | 7      | Clearly define all outcomes, exposures, predictors, potential confounders, and effect modifiers. Give diagnostic criteria, if applicable                                             | 8-10                        |
| Data sources/<br>measurement | 8*     | For each variable of interest, give sources of data and details of methods of assessment (measurement). Describe comparability of assessment methods if there is more than one group | 8-10                        |
| Bias                         | 9      | Describe any efforts to address potential sources of bias                                                                                                                            | 10-11                       |
| Study size                   | 10     | Explain how the study size was arrived at                                                                                                                                            | n/a                         |
| Quantitative variables       | 11     | Explain how quantitative variables were handled in the analyses. If applicable, describe which groupings were chosen and why                                                         | 10-11                       |
| Statistical methods          | 12     | (a) Describe all statistical methods, including those used to control for confounding                                                                                                | 10-11                       |
|                              |        | (b) Describe any methods used to examine subgroups and interactions                                                                                                                  | 10-11                       |
|                              |        | (c) Explain how missing data were addressed                                                                                                                                          | See comment beneath Table 3 |
|                              |        | (d) If applicable, explain how loss to follow-up was addressed                                                                                                                       | n/a                         |
|                              |        | (e) Describe any sensitivity analyses                                                                                                                                                | n/a                         |

| <b>Results</b>           |     |                                                                                                                                                                                                              |                                                    |
|--------------------------|-----|--------------------------------------------------------------------------------------------------------------------------------------------------------------------------------------------------------------|----------------------------------------------------|
| Participants             | 13* | (a) Report numbers of individuals at each stage of study—eg numbers potentially eligible, examined for eligibility, confirmed eligible, included in the study, completing follow-up, and analysed            | Table 3 (numbers of participating health services) |
|                          |     | (b) Give reasons for non-participation at each stage                                                                                                                                                         | n/a                                                |
|                          |     | (c) Consider use of a flow diagram                                                                                                                                                                           | n/a                                                |
| Descriptive data         | 14* | (a) Give characteristics of study participants (eg demographic, clinical, social) and information on exposures and potential confounders                                                                     | Table 5, reported by clinic clusters               |
|                          |     | (b) Indicate number of participants with missing data for each variable of interest                                                                                                                          | Table 3                                            |
|                          |     | (c) Summarise follow-up time (eg, average and total amount)                                                                                                                                                  | n/a                                                |
| Outcome data             | 15* | Report numbers of outcome events or summary measures over time                                                                                                                                               | n/a – time course is summarized in analysis        |
| Main results             | 16  | (a) Give unadjusted estimates and, if applicable, confounder-adjusted estimates and their precision (eg, 95% confidence interval). Make clear which confounders were adjusted for and why they were included | n/a – relevant confounders not established         |
|                          |     | (b) Report category boundaries when continuous variables were categorized                                                                                                                                    | n/a                                                |
|                          |     | (c) If relevant, consider translating estimates of relative risk into absolute risk for a meaningful time period                                                                                             | n/a                                                |
| Other analyses           | 17  | Report other analyses done—eg analyses of subgroups and interactions, and sensitivity analyses                                                                                                               | Table 5                                            |
| <b>Discussion</b>        |     |                                                                                                                                                                                                              |                                                    |
| Key results              | 18  | Summarise key results with reference to study objectives                                                                                                                                                     | 15-16                                              |
| <b>Limitations</b>       |     |                                                                                                                                                                                                              |                                                    |
| Interpretation           | 20  | Give a cautious overall interpretation of results considering objectives, limitations, multiplicity of analyses, results from similar studies, and other relevant evidence                                   | 15-17                                              |
| Generalisability         | 21  | Discuss the generalisability (external validity) of the study results                                                                                                                                        | 17                                                 |
| <b>Other information</b> |     |                                                                                                                                                                                                              |                                                    |
| Funding                  | 22  | Give the source of funding and the role of the funders for the present study and, if applicable, for the original study on which the present article is based                                                | 18-19                                              |

\*Give information separately for cases and controls in case-control studies and, if applicable, for exposed and unexposed groups in cohort and cross-sectional studies.

1  
2  
3  
4  
5  
6  
7  
8  
9  
10  
11  
12  
13  
14  
15  
16  
17  
18  
19  
20  
21  
22  
23  
24  
25  
26  
27  
28  
29  
30  
31  
32  
33  
34  
35  
36  
37  
38  
39  
40  
41  
42  
43  
44  
45  
46

**Note:** An Explanation and Elaboration article discusses each checklist item and gives methodological background and published examples of transparent reporting. The STROBE checklist is best used in conjunction with this article (freely available on the Web sites of PLoS Medicine at <http://www.plosmedicine.org/>, Annals of Internal Medicine at <http://www.annals.org/>, and Epidemiology at <http://www.epidem.com/>). Information on the STROBE Initiative is available at [www.strobe-statement.org](http://www.strobe-statement.org).

For peer review only

# BMJ Open

## Effects of turnover and stability of health staff on quality of care in remote communities of the Northern Territory, Australia: a retrospective cohort study

|                                 |                                                                                                                                                                                                                                                                                                                                                                                                                                                                                                                                                                                                                         |
|---------------------------------|-------------------------------------------------------------------------------------------------------------------------------------------------------------------------------------------------------------------------------------------------------------------------------------------------------------------------------------------------------------------------------------------------------------------------------------------------------------------------------------------------------------------------------------------------------------------------------------------------------------------------|
| Journal:                        | <i>BMJ Open</i>                                                                                                                                                                                                                                                                                                                                                                                                                                                                                                                                                                                                         |
| Manuscript ID                   | bmjopen-2021-055635.R1                                                                                                                                                                                                                                                                                                                                                                                                                                                                                                                                                                                                  |
| Article Type:                   | Original research                                                                                                                                                                                                                                                                                                                                                                                                                                                                                                                                                                                                       |
| Date Submitted by the Author:   | 05-Oct-2021                                                                                                                                                                                                                                                                                                                                                                                                                                                                                                                                                                                                             |
| Complete List of Authors:       | Jones, Michael; Macquarie University<br>Zhao, Yuejen; Northern Territory Department of Health, Population and Digital Health<br>Guthridge, Steven; Menzies School of Health Research, Charles Darwin University<br>Russell, Deborah; Menzies School of Health Research Alice Springs Office, Charles Darwin University<br>Ramjan, Mark; Northern Territory Department of Health, Clinical Governance, Darwin Region & Strategic Primary Health Care<br>Humphreys, John; Monash University, School of Rural Health<br>Wakerman, John ; Menzies School of Health Research Alice Springs Office, Charles Darwin University |
| <b>Primary Subject Heading</b>: | Health services research                                                                                                                                                                                                                                                                                                                                                                                                                                                                                                                                                                                                |
| Secondary Subject Heading:      | Public health, General practice / Family practice                                                                                                                                                                                                                                                                                                                                                                                                                                                                                                                                                                       |
| Keywords:                       | Human resource management < HEALTH SERVICES ADMINISTRATION & MANAGEMENT, Quality in health care < HEALTH SERVICES ADMINISTRATION & MANAGEMENT, PRIMARY CARE                                                                                                                                                                                                                                                                                                                                                                                                                                                             |
|                                 |                                                                                                                                                                                                                                                                                                                                                                                                                                                                                                                                                                                                                         |

SCHOLARONE™  
Manuscripts





I, the Submitting Author has the right to grant and does grant on behalf of all authors of the Work (as defined in the below author licence), an exclusive licence and/or a non-exclusive licence for contributions from authors who are: i) UK Crown employees; ii) where BMJ has agreed a CC-BY licence shall apply, and/or iii) in accordance with the terms applicable for US Federal Government officers or employees acting as part of their official duties; on a worldwide, perpetual, irrevocable, royalty-free basis to BMJ Publishing Group Ltd ("BMJ") its licensees and where the relevant Journal is co-owned by BMJ to the co-owners of the Journal, to publish the Work in this journal and any other BMJ products and to exploit all rights, as set out in our [licence](#).

The Submitting Author accepts and understands that any supply made under these terms is made by BMJ to the Submitting Author unless you are acting as an employee on behalf of your employer or a postgraduate student of an affiliated institution which is paying any applicable article publishing charge ("APC") for Open Access articles. Where the Submitting Author wishes to make the Work available on an Open Access basis (and intends to pay the relevant APC), the terms of reuse of such Open Access shall be governed by a Creative Commons licence – details of these licences and which [Creative Commons](#) licence will apply to this Work are set out in our licence referred to above.

Other than as permitted in any relevant BMJ Author's Self Archiving Policies, I confirm this Work has not been accepted for publication elsewhere, is not being considered for publication elsewhere and does not duplicate material already published. I confirm all authors consent to publication of this Work and authorise the granting of this licence.

1  
2  
3 Title: Effects of turnover and stability of health staff on quality of care in remote  
4  
5 communities of the Northern Territory, Australia: a retrospective cohort study  
6  
7  
8  
9

10 Authors: Michael P Jones,<sup>1</sup> Yuejen Zhao,<sup>2</sup> Steven Guthridge,<sup>3</sup> Deborah Jane Russell,<sup>4</sup> Mark  
11  
12 Ramjan,<sup>5</sup> John S Humphreys,<sup>6</sup> John Wakerman<sup>4</sup>  
13  
14  
15  
16  
17

18 Author affiliations  
19

20 <sup>1</sup>Faculty of Human Sciences, Macquarie University, Sydney, New South Wales,  
21  
22 Australia  
23

24 <sup>2</sup>NT Department of Health, Innovation and Research, Darwin, Northern Territory,  
25  
26 Australia  
27

28 <sup>3</sup>Menzies School of Health Research, Charles Darwin University, Casuarina, Northern  
29  
30 Territory, Australia  
31  
32

33 <sup>4</sup>Menzies School of Health Research, Charles Darwin University, Alice Springs, Northern  
34  
35 Territory, Australia  
36  
37

38 <sup>5</sup>Population and Primary Health Care, Top End Health Services, NT Department of Health,  
39  
40 Darwin, NT, Australia  
41  
42

43 <sup>6</sup>Monash Rural Health, Monash University, Bendigo, Victoria, Australia  
44  
45  
46  
47  
48  
49  
50  
51

52 Corresponding author:  
53  
54  
55

56 Prof Michael P. Jones  
57

58 Psychology Department  
59  
60

1  
2  
3  
4  
5  
6  
7  
8  
9  
10  
11  
12  
13  
14  
15  
16  
17  
18  
19  
20  
21  
22  
23  
24  
25  
26  
27  
28  
29  
30  
31  
32  
33  
34  
35  
36  
37  
38  
39  
40  
41  
42  
43  
44  
45  
46  
47  
48  
49  
50  
51  
52  
53  
54  
55  
56  
57  
58  
59  
60

Macquarie University

North Ryde NSW 2109

Australia

fax: n/a

email: [mike.jones@mq.edu.au](mailto:mike.jones@mq.edu.au)

For peer review only

1  
2  
3 Abstract  
4  
5  
6  
7

8 **Objectives** To evaluate the relationship between markers of staff employment stability and  
9  
10 use of short-term health care workers with markers of quality of care. A secondary objective  
11  
12 was to identify clinic-specific factors which may counter hypothesised reduced quality of  
13  
14 care associated with lower stability, higher turnover or higher use of short-term staff.  
15  
16

17 **Design** Retrospective cohort study (NT Department of Health Primary Care Information  
18  
19 Systems).  
20  
21

22 **Setting** All 48 Government primary health care clinics in remote communities in Northern  
23  
24 Territory, Australia (2011-15).  
25  
26

27 **Participants** 25,413 patients drawn from participating clinics during the study period.  
28  
29

30 **Outcome Measures** Associations between independent variables (Resident Remote Area  
31  
32 Nurse (RAN) and Aboriginal Health Practitioner (AHP) turnover rates, stability rates and the  
33  
34 proportional use of agency nurses) and indicators of health service quality in child and  
35  
36 maternal health, chronic disease management and preventive health activity were tested  
37  
38 using linear regression, adjusting for community and clinic size. Latent class modelling was  
39  
40 used to investigate between-clinic heterogeneity.  
41  
42  
43

44 **Results** The proportion of resident Aboriginal clients receiving high quality care as measured  
45  
46 by various quality indicators varied considerably across indicators and clinics. Higher quality  
47  
48 care was more likely to be received for management of chronic diseases such as diabetes  
49  
50 and least likely to be received for general/preventive adult health checks. Many indicators  
51  
52 had target goals of 0.80 which were mostly not achieved. The evidence for associations  
53  
54 between decreased stability measures or increased use of agency nurses and reduced  
55  
56 achievement of quality indicators was not supported as hypothesised. For the majority of  
57  
58  
59  
60

1  
2  
3 associations, the overall effect sizes were small (close to zero) and failed to reach statistical  
4  
5 significance. Where statistically significant associations were found, they were generally in  
6  
7 the hypothesised direction.  
8  
9

10 **Conclusions** Overall, minimal evidence of the hypothesised negative effects of increased  
11  
12 turnover, decreased stability and increased reliance on temporary staff on quality of care  
13  
14 was found. Substantial variations in clinic-specific estimates of association were evident,  
15  
16 suggesting that clinic-specific factors may counter any potential negative effects of  
17  
18 decreased staff employment stability. Investigation of clinic-specific factors using latent  
19  
20 class analysis failed to yield clinic characteristics that adequately explain between-clinic  
21  
22 variation in associations. Understanding the reasons for this variation would significantly aid  
23  
24 the provision of clinical care in remote Australia.  
25  
26  
27  
28  
29  
30  
31  
32

### 33 **Strengths and limitations of this study**

- 34  
35 • Data are for an entire population—remote living residents in communities serviced  
36  
37 by Northern Territory Department of Health;
- 38  
39 • Analyses adjusted for key potential confounders, including remote community  
40  
41 population size, average number of employees, Euclidean distance in kilometres to  
42  
43 the major centres of Darwin or Alice Springs (whichever was closest) and Euclidean  
44  
45 distance in kilometres to the nearest of the five NT hospitals;
- 46  
47 • The major limitation was the retrospective design, relying on routinely collected and  
48  
49 administrative data.  
50  
51  
52  
53  
54  
55  
56  
57  
58  
59  
60

## INTRODUCTION

Australia is a geographically large country (7.7 million square kilometres) with a concentration of both population and health care resources along its eastern and southern seaboard.<sup>1</sup> In 2019, 69% of the Australian estimated resident population lived in the eastern and southern seaboard State capital cities and three large regional towns (Newcastle, Wollongong and Geelong)<sup>2</sup>. A relatively small fraction of the Australia's health care resources are used to service the primary health care (PHC) needs of its extensive rural and remote populations, with the National Rural Health Alliance estimating a large rural health expenditure deficit of approximately \$2bn per annum.<sup>3</sup>

In non-metropolitan Australia, access to PHC is further limited by the combination of high health need and the need for cultural competency when providing health services for Australian Aboriginal and Torres Strait Islander populations who have much greater health needs across both acute and chronic conditions relative to all Australians.<sup>4</sup> This is particularly apparent in the Aboriginal population of the Northern Territory (NT) where chronic diseases such as cardiovascular disease and diabetes are up to four times more prevalent and life expectancy at birth is approximately 16 years less than the corresponding measure for Australia as a whole.<sup>5</sup> While continuity of care is important for all patients, it is especially important for vulnerable populations, such Aboriginal and Torres Strait Islander populations living in small, isolated communities.<sup>6,7</sup> Continuity of high quality PHC can help ensure chronic health conditions are prevented where possible, and diagnosed early and managed optimally where not, ensuring that patients avoid potentially preventable hospitalisations.<sup>8,9</sup>

1  
2  
3 The long-standing geographical maldistribution of general practitioners (GPs) has been the  
4 target of numerous programs by government and health professional bodies over a long  
5  
6 period, with only mixed success.<sup>10-12</sup> In geographically remote areas, PHC services are more  
7  
8 commonly provided by resident Remote Area Nurses (RANs) and Aboriginal Health  
9  
10 Practitioners (AHPs), supported by visiting medical, nursing and allied health professionals,  
11  
12 and other short-term health workers engaged on a fly-in fly-out or drive-in-drive-out basis  
13  
14 and often engaged through employment agencies.<sup>13</sup> While resident staff remain in a  
15  
16 community from months to several years and therefore get to know and be known by  
17  
18 community members, short-term employment agency staff may only be in a community for  
19  
20 a period of weeks. Such short tenure makes continuity of care less attainable and staff less  
21  
22 able to develop appropriate levels of cultural and social awareness to engage effectively  
23  
24 with local residents, leading to lower utilisation of PHC services.<sup>14,15</sup> Lower PHC utilisation  
25  
26 may contribute to poorer health outcomes: better access and utilisation of PHC by  
27  
28 Aboriginal people living in remote NT communities and remote outstations is associated  
29  
30 with lower mortality, lower morbidity and more cost-effective health care, though the  
31  
32 association between PHC utilisation and hospitalisations is more complex.<sup>16-18</sup>

33  
34  
35 A further potential consequence of poor continuity of care and cultural attunement of  
36  
37 health care staff is reduced quality of care. Short-term staff may focus on acute care needs  
38  
39 and neglect or have insufficient awareness of preventive and chronic care needs, such as  
40  
41 health promotion, health screening, monitoring chronic health conditions, encouraging  
42  
43 smoking cessation or checking the immunisation status of infants and adults. Most, though  
44  
45 not all, research shows that continuity of PHC provider is associated with better control of  
46  
47 type 2 diabetes<sup>19-22</sup> as well as increased provision of preventive care services including  
48  
49 immunisations and screening for hypertension, alcohol abuse and high cholesterol levels.<sup>23</sup>  
50  
51  
52  
53  
54  
55  
56  
57  
58  
59  
60

1  
2  
3 However, the extent to which continuity of care and measures of staff turnover and stability  
4  
5 are associated with quality of care in complex cross-cultural contexts characterised by  
6  
7 reliance on short-term PHC providers is not well-understood. While research using a case  
8  
9 study design suggests that in remote NT, PHC workforce turnover is the most significant  
10  
11 barrier to successful quality improvement, the association between workforce turnover or  
12  
13 stability and quality of PHC in remote NT is yet to be verified using stronger study designs.<sup>24</sup>  
14  
15  
16

17  
18 This article therefore seeks to evaluate the relationship between markers of staff  
19  
20 employment stability and turnover and use of short-term PHC staff with markers of quality  
21  
22 of care, in order to determine whether these are detrimental to the care received by  
23  
24 residents of remote locations. We hypothesised that stability would be positively associated  
25  
26 with quality measures and that turnover and the use of short-term PHC staff would be  
27  
28 negatively associated with quality measures. We also sought to identify factors which may  
29  
30 counter hypothesised reduced quality of care associated with lower stability, higher  
31  
32 turnover or higher use of short-term staff.  
33  
34  
35  
36  
37  
38  
39  
40

## 41 **METHODS**

### 42 43 44 45 46 Study design and setting

47  
48  
49  
50 This observational study has a retrospective cohort design: the cohort consists of patients,  
51  
52 RANs, AHPs and short-term staff of 48 NT Department of Health (DoH) remote clinics during  
53  
54 the period 2011-2015, inclusive.  
55  
56  
57  
58  
59  
60



## Data

Data were provided by the NT DoH. Workforce data were obtained from the Personnel Information and Payroll Systems (PIPS) dataset. PIPS data provided comprehensive, individual-level, de-identified information on all RANs and AHPs paid directly through the NT DoH payroll. These data were used to ascertain the number of RAN and AHP exits from remote health services and to calculate annual turnover and 12-month stability rates. The Government Accounting System (GAS) was used to identify labour hire costs for agency nurses paid directly by employment agencies (hereafter termed agency nurses). The aggregated full-time equivalent (FTE) for agency-employed nurses working in remote health services was derived using the standard NT DoH formula of agency labour expenses divided by twice the departmental annual average nurse personnel cost.<sup>25</sup>

Quarterly Traffic Light Reports were produced by NT DoH staff for each remote community as part of the Chronic Conditions Management Model.<sup>26</sup> The combined Traffic Light Report, which has retrospective data for all NT DoH remote health clinics, was the source of data for twelve quality indicators. Data for some indicators were available every 3 months from March 2012 through to November 2015, though reporting on other indicators commenced at a later date (the latest being August 2013). Additionally, routine health services reports of NT Aboriginal Health Key Performance Indicators (AHKPIs), extracted from the NT DoH Primary Care Information Systems (PCIS), were the source of data for a further twelve quality indicators. The NT AHKPI data related to outcomes for 25,413 patients. NT AHKPI data were available for 48 of 53 NT DoH clinics in the larger study. NT AHKPI data were not available for five clinics that used a different PHC electronic clinical records management system.

## Measures

In this study the main independent variables were clinic-level measures of RAN and AHP annual turnover and 12-month stability, and the proportional use of agency nurses.

Hereafter, these three measures will be collectively referred to as markers of staff employment stability. We used three different measures of staff employment stability because of the complexities involved in staffing remote health services, the known heavy reliance on agency nurses in remote NT and because none of these workforce metrics on their own provide a sufficiently comprehensive picture of workforce mobility patterns.<sup>27,28</sup>

The three main workforce metrics are defined in Table 1. An additional metric, the number of exits from a health service (which is the numerator of the turnover metric), was used in the Latent Class Analysis.

[Table 1 about here]

Additional independent variables (potential confounders) included remote community population size, average number of employees, Euclidean distance in kilometres to the major centres of Darwin or Alice Springs (whichever was closest) and Euclidean distance in kilometres to the nearest of the five NT hospitals (distances calculated using google maps).

The socioeconomic status of the community in which each clinic was located was measured using the Index of Relative Socio-economic Advantage and Disadvantage (IRSAD) for clinic catchment areas' average scores for Indigenous localities (ILOC)<sup>29</sup> as measured in the 2011 national census conducted by the Australian Bureau of Statistics (ABS). The Aboriginal composition of each community was measured as the proportion of the resident population

1  
2  
3 identifying as an Aboriginal person in the 2016 census.<sup>30</sup> The latter was dichotomised into  
4 whether or not Aboriginal people comprised a majority of the population (>50%) in the  
5  
6  
7  
8 community.

9  
10 We were initially provided with data for 24 quality indicators (several of which were the  
11  
12 same indicator but measured using different data sources at slightly different time points).  
13  
14 Some indicators also had more than one component. For example, child immunisation was  
15  
16 categorised into different age groups and glycosylated haemoglobin (HbA1c) results were  
17  
18 categorised into different levels of glycaemic control. Our aim was to examine a sufficient  
19  
20 range of indicators of quality of care to ensure that a reasonable spectrum of PHC activities  
21  
22 was covered by the indicators, rather than to be exhaustive. We therefore grouped quality  
23  
24 indicators into three categories: child and maternal health; chronic disease management;  
25  
26 and preventive health activity, and reduced the number of indicators, ensuring there were  
27  
28 at least three indicators within each category. (Table 2) The reporting period for the  
29  
30 indicators ranged from six months for the HbA1c test reported in the NT AHKPIs, up to two  
31  
32 years.  
33  
34  
35  
36  
37  
38  
39

40 [Insert Table 2 about here]

#### 41 42 43 44 **Statistical approach**

45  
46  
47 The associations between markers of staff employment stability (independent variables)  
48  
49 and markers of quality (dependent variables) were assessed using linear regression which  
50  
51 employed the linearisation method<sup>31</sup> to estimate the within-clinic correlation and adjust  
52  
53 standard errors accordingly. Each dependent variable was expressed as the sequential  
54  
55 change from the previous period (month, quarter or half year) to express change in  
56  
57 indicator status. Due to the non-Normal distribution of some outcome variables, formal  
58  
59  
60

1  
2  
3 statistical inference employed the nonparametric bootstrap method. The direction and  
4  
5 strength of the associations between independent variables and dependent variables is  
6  
7 reported through the regression slopes ( $\beta$  coefficients) along with 95% confidence interval  
8  
9 upper and lower limits and two-tailed p-values. Analyses adjusted for potential  
10  
11 confounders. It is noted that this is an exploratory study, the first of its kind in this  
12  
13 environment, and therefore no allowance for multiple hypothesis testing has been made.  
14  
15 We therefore interpret statistically significant results as indicative rather than definitive.  
16  
17  
18  
19  
20  
21 Clinic-specific estimates of the associations between independent variables and dependent  
22  
23 variables were also calculated using linear regression and the standard deviation of  
24  
25 coefficients is reported as a measure of between-clinic variation in the influence of markers  
26  
27 of staff employment stability on quality of care. To facilitate understanding of the  
28  
29 proportion of clinics that experience positive, negative or no association with a given  
30  
31 measures of staffing, standardized coefficient were classified as  $\leq -0.1$ ,  $> -0.1$  to  $< 0.1$  and  
32  
33  $\geq 0.1$ .  
34  
35  
36  
37

38  
39 Considerable between-clinic heterogeneity was identified. To aid in understanding clinic  
40  
41 profiles that are associated with stronger or weaker associations, clinics were clustered into  
42  
43 mutually exclusive groups based on their markers of staff employment stability using latent  
44  
45 class models.<sup>32</sup> A cluster membership probability is calculated for each cluster for each  
46  
47 clinic and clinics are allocated to the cluster for which they have highest probability of  
48  
49 membership. Variation between clusters of clinics with respect to association (slopes)  
50  
51 between markers of staff employment stability and quality measures were examined to  
52  
53 generate hypotheses concerning clinic factors that might counter the effects of reduced  
54  
55 staffing stability or increased turnover or use of agency nurses. The clustering process can  
56  
57  
58  
59  
60

1  
2  
3 be hindered by multivariate outliers that have undue influence on the cluster solution.<sup>33,34</sup>  
4  
5 For this reason a two-cluster solution was set as a first step in which forty-four clinics were  
6  
7 allocated to one cluster and just four into the second. The analysis was then repeated on  
8  
9 the forty-four remaining clinics. The four clinics omitted from the latent class analysis  
10  
11 reported (due to them being outliers that could unduly influence further analysis) were  
12  
13 statistically significantly associated with lower stability ( $p=0.04$ ), higher turnover ( $p=0.002$ )  
14  
15 and lower proportional use of agency nurses ( $p=0.004$ ). Quality-of-care measures for the  
16  
17 four clinics that were omitted from the modelling as multivariate outliers were also  
18  
19 compared with the clinics included in the analysis. Given the very small number of clinics  
20  
21 omitted it is difficult to make any firm conclusions, and no differences reached statistical  
22  
23 significance, but there was a general trend for these clinics to have lower rates of meeting  
24  
25 quality criteria.  
26  
27  
28  
29  
30  
31  
32

### 33 **Patient and public involvement**

34  
35 It was not appropriate or possible to involve patients or the public in the design, or conduct,  
36  
37 or reporting, or dissemination plans of the research reported here. Nevertheless, this study  
38  
39 formed part of a broader project which used mixed-methods, including interviews and focus  
40  
41 group discussions with clinic users. The results of the broader project were disseminated to  
42  
43 participants and the analysis of the broader project informed the interpretation of this  
44  
45 study's findings and discussion.  
46  
47  
48  
49  
50  
51  
52

## 53 **RESULTS**

54  
55 Included clinics were relatively small with respect to staffing (Table 3) and located long  
56  
57 distances from the major NT centres of Darwin and Alice Springs, on average 304 kilometres  
58  
59  
60

1  
2  
3 (SD=191) from the nearest of these. The average clinic had 4-5 staff at any point in time  
4  
5  
6 although there was considerable variation between clinics with some having less than one  
7  
8 and others almost twenty. Similarly, there was considerable between-clinic variation in the  
9  
10 measures of turnover, stability and use of short-term staff, with some clinics having mean  
11  
12 scores approximately twice the overall average. Agency nurses made up a little under 20%  
13  
14 of remote staff, on average, although these values also varied considerably between clinics  
15  
16 with the highest being over 40%.  
17

18  
19  
20  
21 [Insert Table 3 about here]  
22  
23

24  
25  
26 The proportion of resident Aboriginal clients receiving high quality care as measured by the  
27  
28 various quality indicators varied considerably across indicators and clinics (with some  
29  
30 variation also evident by dataset). On average, high quality care was more likely to be  
31  
32 received for management of chronic disease such as diabetes and least likely to be received  
33  
34 for general/preventive adult health checks. Many indicators used in the Traffic Light Report  
35  
36 program had target goals of 0.80. These target goals were mostly not achieved.  
37  
38  
39  
40

41  
42  
43  
44 [Insert Table 4 about here]  
45  
46  
47  
48  
49

50 The evidence for associations between markers of staff employment stability and reduced  
51  
52 performance as measured by markers of quality was not supported as hypothesised. For the  
53  
54 majority of associations reported in Table 4 the overall effect sizes (slopes) were small (close  
55  
56 to zero) and failed to reach statistical significance. Where statistically significant associations  
57  
58 were found, however, they were generally in the hypothesised direction. Examples include  
59  
60

1  
2  
3 increased turnover being associated with lower proportions of eligible women having pap  
4 smears within the previous five years and lower proportions of children being fully  
5 immunised (6-11 months); and increased stability associated with glycaemic control  
6 (HbA1c $\leq$ 8%). There were however exceptions, such as where increased turnover was  
7 associated with higher achievement of adult 55+ health checks.  
8  
9  
10  
11  
12  
13  
14  
15  
16  
17  
18

19 [Insert Figure 1 about here]  
20

21  
22 A common finding was considerable between-clinic variation in markers of staff  
23 employment stability and quality indicators, although the degree of variation between  
24 clinics was inconsistent and differed with different levels of a quality indicator. Figure 1  
25 illustrates this for the association between proportion of agency nurse and three levels of  
26 provision of antenatal care where the median slope is close to zero for all three levels of the  
27 antenatal care indicator. During the first and second trimester, the association with  
28 proportion of agency nurses appears to vary widely between positive and negative values  
29 while for receiving care at any time before the end of pregnancy there is relatively little  
30 between-clinic variation. In this example, if we calculate standardized mean differences  
31 (SMDs) based on the SD of the 13 week clinic-specific estimates and classify each clinic's  
32 estimate as negative, effectively zero or positive based on thresholds of  $\leq$ -0.1, between -0.1  
33 and +0.1 or  $\geq$ 0.1 the percentage of clinics with negative, nil or positive associations with  
34 agency nurse proportion were 53%, 7%, 40% (respectively) at 13 weeks, 44%, 14%, 42% at  
35 20 weeks and 12%, 65%, 23% by end of pregnancy. Hence the overall association effect size  
36 can hide considerable variation in the direction and magnitude of association in individual  
37 clinics.  
38  
39  
40  
41  
42  
43  
44  
45  
46  
47  
48  
49  
50  
51  
52  
53  
54  
55  
56  
57  
58  
59  
60

[Insert Table 5 about here]

Subsequent to finding the considerable variation between clinics described above, latent class analysis was undertaken which identified three clusters of clinics (columns labelled 1, 2 and 3 in Table 5) which appear to represent a gradient in the markers of staff employment stability. Cluster 1 is distinguished by comparatively high service populations, larger staff numbers and correspondingly high mean number of staff exits but also high variance in staff exits over time. This cluster has levels of average stability and turnover that are in between those of Clusters 2 and 3. The second cluster services smaller populations than cluster 1 and has correspondingly smaller staff numbers. It also has comparatively low average and variance in staff exits, lower turnover and higher stability scores, hence represents a hypothetically desirable group of clinics on average. The third cluster services the smallest populations, on average, and has correspondingly the lowest average staff numbers. It lies between the first and second with lower mean and variance over time in staff exits than Cluster 1 but has the highest turnover (indicative of smaller clinic size than Cluster 1 clinics), the lowest stability and the highest proportional use of agency nurses, hence represents a hypothetically undesirable group of clinics on average. There was overall less variation in the mean proportion of agency nurses between clusters, with Cluster 2 having the lowest proportion (17%) and Cluster 3 the highest (20%).

[Insert Table 6 about here]

In general, there was not clinically meaningful and statistically significant variance in quality indicator achievement between clusters (Table 6). Exceptions were lower use of Angiotensin



1  
2  
3 Converting Enzyme Inhibitor and/or Angiotensin Receptor Blocker in Cluster 1 than Clusters  
4  
5 2 and 3 and higher rates of childhood anaemia in clinics in cluster 1 than in Clusters 2 and 3.  
6  
7  
8 However in general the clusters are not differentiated with respect to indicators of quality  
9  
10 of care.  
11

12  
13 [Insert Table 7 about here]  
14  
15  
16  
17  
18

19 Table 7 presents the mean association effect sizes across clusters according to the markers of staff  
20  
21 employment stability and quality indicator combinations. In general clusters did not differ  
22  
23 substantially or in a statistically significant way with respect to strength/direction of the association.  
24  
25 Exceptions included the association between stability and antenatal care at any time during  
26  
27 pregnancy for which Cluster 1 reported a statistically significant negative association; and pap  
28  
29 smears at two years, for which Cluster 1 reported a statistically significant positive association with  
30  
31 stability. All other clusters reported no association.  
32  
33  
34  
35  
36  
37

## 38 DISCUSSION

39  
40  
41  
42

43 Overall, minimal evidence of the hypothesised negative effects of increased turnover,  
44  
45 decreased stability and increased reliance on temporary staff on quality of care was found.  
46  
47  
48 In a small number of cases there were statistically significant associations in the  
49  
50 hypothesised direction, a smaller number in a direction opposite to that hypothesised, but  
51  
52 the majority yielded overall association measures (slopes) that were close to zero and failed  
53  
54 to reach statistical significance (Table 2). While these findings could indicate that the  
55  
56 hypothesised negative effects of staffing instability on quality of care are not supported by  
57  
58 the evidence, there are several pointers that on-the-ground reality might not be that simple.  
59  
60

1  
2  
3 First, while the overall estimates of association were all close to zero, there was substantial  
4 variation in the clinic-specific estimates, meaning that in some clinics quality was negatively  
5 associated with higher turnover, lower stability and higher use of short-term staff but in  
6 other clinics quality was unrelated or even positively related with these measures. The  
7 latter, counter-hypothesised results might reflect random chance but they might also reflect  
8 clinic-specific factors that counter the potential negative effects of decreased workforce  
9 stability, increased turnover and increased use of short-term staff. An illustration of the  
10 fraction of clinics with negative, effectively zero or positive associations was given for  
11 antenatal care as the quality indicator and proportion of agency nurses as the stability  
12 measure. Where the association was clearly not statistically significant 65% of clinics had  
13 estimate associations that were effectively zero, with the remainder split between some  
14 degree of negative or positive associations. A clustering of clinics based on markers of staff  
15 employment stability failed to yield clinic groupings that explain the between-clinic variation  
16 in associations (Table 7).

17  
18 Alternate explanations of this variability might include a number of unquantified local  
19 factors. For example, a competent clinic manager may be able to manage an unstable  
20 workforce more effectively, thus mitigating the deficits that might otherwise have  
21 occurred.<sup>35</sup> A robust Continual Quality Improvement program, visiting outreach health  
22 staff, and clinic-level data reports may also counter any negative effects of employment  
23 instability. Heavy reliance on short-term agency nurses might not be as detrimental as  
24 hypothesised if some of these nurses return repeatedly to the same clinic or group of clinics,  
25 and thus have local knowledge and long-standing relationships with residents which  
26 facilitate continuity of care.<sup>36</sup> Or it may be that in some instances skilled agency nurses  
27 enable resident RANs to take planned annual leave or undertake professional development,

1  
2  
3 rather than having a stream of inexperienced or poorly prepared agency nurses filling  
4  
5 longstanding vacancies at short notice.<sup>35</sup> In these ways, the administrative data might  
6  
7 indicate greater instability in the workforce than is actually experienced in terms of  
8  
9 continuity of care on the ground.  
10  
11

12  
13 Other factors that cannot be readily quantified that may contribute to the observed  
14  
15 variability include both the clinical and cultural competence of short-term health staff.<sup>35</sup> The  
16  
17 acceptability of the service to local residents is not only a function of the cultural  
18  
19 competence of non-Aboriginal or Torres Strait Islander staff, but also the presence of  
20  
21 Aboriginal staff, both clinical and non-clinical staff such as administrative officers, drivers  
22  
23 and groundsmen. These non-clinical staff are often long-serving and knowledgeable. Their  
24  
25 varying numbers across clinics may also help to explain the variability in the results  
26  
27 presented.<sup>35,37</sup>  
28  
29  
30  
31  
32

33 Given the high health care needs of Aboriginal and Torres Strait Islander populations living  
34  
35 in remote communities, and the importance of ensuring equitable access to high quality  
36  
37 primary health care, future research is warranted to explore whether and how the range of  
38  
39 factors postulated as possible explanations are indeed associated with the substantial  
40  
41 between-clinic variation in quality of primary care in remote clinics. The authors are  
42  
43 currently undertaking some of this work by examining whether similar patterns exist in  
44  
45 Aboriginal Community Controlled Health Services in the same jurisdiction and will be  
46  
47 updating analyses with NT Department of Health data to try and gain a better  
48  
49 understanding of the extent to which a range of factors identified as differentiating  
50  
51 Indigenous Primary Health Care models from mainstream services, such as cultural safety,  
52  
53 having a culturally appropriate and skilled Indigenous workforce and increased acceptability  
54  
55  
56  
57  
58  
59  
60

1  
2  
3 of the health service to community members are associated with variability in quality of  
4  
5 care.<sup>38,39</sup>  
6  
7  
8  
9

## 10 11 **LIMITATIONS**

12  
13  
14 This study relied on territory-wide, routinely collected data to test its hypotheses rather  
15  
16 than collecting data prospectively using definitions and in formats that might have been  
17  
18 optimal for the purpose. The routine collection is used to guide service delivery and is  
19  
20 routinely reported at both NT and national levels. Its use for this study was not only guided  
21  
22 by feasibility but also to demonstrate the wider utility of the collection. Nonetheless the use  
23  
24 of the existing collection contributed to both measurement noise and definitional  
25  
26 challenges which made underlying associations less evident. For example, the use of agency  
27  
28 nurses in NT DoH remote clinics are recorded either in payroll data or in expenditure data,  
29  
30 depending on the payment arrangements that NT DoH has with each nursing agency. For  
31  
32 this study agency nurses recorded in the NT DoH payroll were included in turnover and  
33  
34 stability figures, whereas work by agency nurses recorded in expenditure data were  
35  
36 included in the estimation of agency nurse proportion. A further limitation related to our  
37  
38 choice of workforce indicators. Given the dearth of literature describing health workforce  
39  
40 metrics specific to the Australian remote Aboriginal and Torres Strait Islander context, our  
41  
42 choice of health workforce indicators was guided by literature taken from the rural  
43  
44 Australian context.<sup>27</sup> The metrics we chose were unable to capture all important facets of  
45  
46 the remote health workforce, including, for example, employment of local Aboriginal staff.  
47  
48 Our study used a selection of clinical indicators of quality of care. Other than the  
49  
50  
51  
52  
53  
54  
55  
56  
57  
58  
59  
60  
aforementioned employment stability indicators, no non-clinical indicators were used. Thus,

1  
2  
3 even though it is recognised that characteristics such as culture, community participation  
4  
5 and self-determination are important for providing high quality Indigenous primary health  
6  
7 care services, indicators measuring these were not included. Additionally, no data were  
8  
9 available on the proportion of patients with cardiovascular disease on acetylsalicylic acid, so  
10  
11 even though measurement of this outcome was described in the study protocol, this  
12  
13 indicator was not used. A further limitation was that it was not possible to allocate staff  
14  
15 working in a supernumerary capacity in a remote health clinic to that clinic as this wasn't  
16  
17 recorded in the administrative records used. Finally, the research relates to a very specific  
18  
19 context of government-provided PHC in small, remote NT communities and the findings may  
20  
21 not be generalisable to other health systems, service models, geographical settings or study  
22  
23 populations.  
24  
25  
26  
27  
28  
29

## 30 **CONCLUSION**

31  
32 Overall, minimal evidence of the hypothesised negative effects of increased turnover,  
33  
34 decreased stability and increased reliance on temporary staff on quality of care was found.  
35  
36 Substantial variations in clinic-specific estimates of association were evident, suggesting  
37  
38 that clinic-specific factors may counter any potential negative effects of decreased staff  
39  
40 employment stability. Investigation of clinic-specific factors using latent class analysis failed  
41  
42 to yield clinic characteristics that adequately explain between-clinic variation in  
43  
44 associations. Understanding the reasons for this variation would significantly aid the  
45  
46 provision of clinical care in remote Australia.  
47  
48  
49  
50  
51  
52

## 53 **Acknowledgements**

54  
55 The authors thank the Northern Territory Department of Health staff who provided  
56  
57 technical assistance in accessing and interpreting departmental personnel, primary health  
58  
59  
60

1  
2  
3 care, hospitalisation and financial data. The authors also acknowledge and sincerely thank  
4  
5 all staff working in the remote NT communities, particularly the clinic managers.  
6  
7

### 8 **Contributors**

9  
10  
11 MPJ contributed to the design of the study and led analysis and drafting of the paper. JW  
12  
13 led the conceptualisation and overall study design and contributed to drafting the paper.  
14  
15 JSH contributed to the conceptualisation and design of the study and assisted with drafting  
16  
17 the manuscript. SG, YZ, MR and DJR contributed to the design of the study and assisted with  
18  
19 drafting the manuscript. All authors read and approved the final manuscript.  
20  
21  
22  
23  
24  
25  
26

### 27 **Funding statement**

28  
29 This work was supported by the Australian Research Council's Discovery Projects funding  
30  
31 scheme (project number DP150102227). The funder had no input in to the design, conduct  
32  
33 and reporting of this analysis.  
34  
35  
36  
37  
38  
39

### 40 **Competing interests statement**

41  
42 None declared.  
43  
44  
45  
46

### 47 **Patient consent for publication**

48  
49 Not required.  
50  
51  
52  
53

### 54 **Ethics approval**

55  
56 Ethics approval was received from the Human Research Ethics Committee of the Northern  
57  
58 Territory Department of Health and Menzies School of Health Research (2015-2363).  
59  
60

**Provenance and peer review**

Not commissioned; externally peer reviewed.

**Data availability statement**

The datasets generated and analysed during the current study are not publicly available due to identifiability of remote primary health care providers and the need to protect their privacy.

**Author note**

Original protocol for the study: The original protocol for the study is published and available (open access): Wakerman J, Humphreys JS, Bourke L, Dunbar T, Jones M, Carey T, et al. Assessing the impact and cost of short-term health workforce in remote Indigenous communities in Australia: a mixed methods study protocol. JMIR research protocols. 2016;5(4):e135.

## References

1. Australian Government. The Australian continent. 2019. <https://www.australia.gov.au/about-australia/our-country/the-australian-continent> (accessed 11 Feb 2019).
2. ABS. ABS 2020 Regional Population Growth, Australia, 2018-19. Canberra: Australian Bureau of Statistics, 2020.
3. Australian Bureau of Statistics. ABS 2011 Census of Population and Housing. Data generated using ABS TableBuilder. Canberra: ABS; 2011.
4. Australian Institute of Health and Welfare. Australian Burden of Disease Study: fatal burden of disease in Aboriginal and Torres Strait Islander people 2010. Australian Burden of Disease Study series no. 2. Cat. no. BOD 2. Canberra: AIHW; 2015.
5. Georges N, Guthridge SL, Li SQ, Condon JR, Barnes T, Zhao Y. Progress in closing the gap in life expectancy at birth for Aboriginal people in the Northern Territory, 1967-2012. *Med J Aust* 2017; **207**(1): 25-30.
6. Maarsingh OR, Henry Y, van de Ven PM, Deeg DJ. Continuity of care in primary care and association with survival in older people: a 17-year prospective cohort study. *Br J Gen Pract* 2016; **66**(649): e531-e9.
7. Minore B, Boone M, Katt M, Kinch P, Birch S, Mushquash C. The effects of nursing turnover on continuity of care in isolated First Nation communities. *CJNR (Canadian Journal of Nursing Research)* 2005; **37**(1): 86-101.
8. Menec VH, Sirski M, Attawar D, Katz A. Does continuity of care with a family physician reduce hospitalizations among older adults? *J Health Serv Res Policy* 2006; **11**(4): 196-201.
9. Barker I, Steventon A, Deeny S. Continuity of care in general practice is associated with fewer ambulatory care sensitive hospital admissions: a cross-sectional study of routinely collected, person-level data. *Clin Med (Lond)* 2017; **17**(Suppl 3): s16.
10. Mason J. Review of Australian government health workforce programs. Canberra: Australian Government Department of Health, 2013.
11. Gibbon P, Hales J. Review of the rural retention program. Final Report. Kent Town SA: Australian Government Department of Health and Ageing; 2006.
12. Walters L, McGrail M, Carson D, et al. Where to next for rural general practice policy and research in Australia? *Med J Aust* 2017; **207**(2): 56-8.
13. Wakerman J, Curry R, McEldowney R. Fly in/fly out health services: The panacea or the problem? *Rural Remote Health* 2012; **12**: 2268.
14. Guerin P, Guerin B. Social effects of fly-in-fly-out and drive-in-drive-out services for remote indigenous communities. *Australian Community Psychologist* 2009; **21**(2): 8-23.
15. van Walraven C, Oake N, Jennings A, Forster AJ. The association between continuity of care and outcomes: a systematic and critical review. *J Eval Clin Pract* 2010; **16**(5): 947-56.
16. Rowley KG, O'Dea K, Anderson I, et al. Lower than expected morbidity and mortality for an Australian Aboriginal population: 10-year follow-up in a decentralised community. *Med J Aust* 2008; **188**(5): 283-7.



17. Thomas SL, Zhao Y, Guthridge SL, Wakerman J. The cost-effectiveness of primary care for Indigenous Australians with diabetes living in remote Northern Territory communities. *Med J Aust* 2014; **200**(11): 658-62.
18. Zhao Y, Wright J, Guthridge S, Lawton P. The relationship between number of primary health care visits and hospitalisations: evidence from linked clinic and hospital data for remote Indigenous Australians. *BMC Health Serv Res* 2013; **13**: 466.
19. Saint-Pierre C, Prieto F, Herskovic V, Sepúlveda M. Relationship between Continuity of Care in the Multidisciplinary Treatment of Patients with Diabetes and Their Clinical Results. *Applied Sciences* 2019; **9**(2): 268.
20. Lustman A, Comaneshter D, Vinker S. Interpersonal continuity of care and type two diabetes. *Prim Care Diabetes* 2016; **10**(3): 165-70.
21. Younge R, Jani B, Rosenthal D, Lin SX. Does continuity of care have an effect on diabetes quality measures in a teaching practice in an urban underserved community? *J Health Care Poor Underserved* 2012; **23**(4): 1558-65.
22. Gulliford MC, Morgan M, Naithani S. Continuity of care and intermediate outcomes of type 2 diabetes mellitus. *Fam Pract* 2007; **24**(3): 245-51.
23. Flach SD, McCoy KD, Vaughn TE, Ward MM, Bootsmiller BJ, Doebbeling BN. Does patient-centered care improve provision of preventive services? *J Gen Intern Med* 2004; **19**(10): 1019-26.
24. Busbridge MJ, Smith A. Fly in/fly out health workers: a barrier to quality in health care. *Rural Remote Health* 2015; **15**(2): 3339.
25. Northern Territory Government Department of Health. Indicator definition: Full Time Equivalents v1.0. Darwin: NTG Department of Health, 2015.
26. Burgess CP, Sinclair G, Ramjan M, Coffey PJ, Connors CM, Katekar LV. Strengthening cardiovascular disease prevention in remote indigenous communities in Australia's Northern Territory. *Heart Lung Circ* 2015; **24**(5): 450-7.
27. Russell DJ, Humphreys JS, Wakerman J. How best to measure health workforce turnover and retention: Five key metrics. *Aust Health Rev* 2012; **36**(3): 290-5.
28. Northern Territory Department of Health. Remote Area Nurse safety: On-call after hours security. Darwin: NT Department of Health; 2016.
29. ABS. Technical Paper: Socio-Economic Indexes for Areas (SEIFA). Canberra: Australian Bureau of Statistics, 2018.
30. Australian Bureau of Statistics. 2011 Census QuickStats. 2013. [https://quickstats.censusdata.abs.gov.au/census\\_services/getproduct/census/2011/quickstat/0](https://quickstats.censusdata.abs.gov.au/census_services/getproduct/census/2011/quickstat/0) (accessed 21 June 2021).
31. Kish L. Survey Sampling. New York, London: John Wiley & Sons Inc.; 1965.
32. Hagenaars JA, McCutcheon AL. Applied latent class analysis. New York: Cambridge University Press; 2002.
33. Jiang MF, Tseng SS, Su CM. Two-phase clustering process for outliers detection. *Pattern Recognition Letters* 2001; **22**(6): 691-700.
34. Wang H, Shan H, Banerjee A. Bayesian cluster ensembles. *Statistical Analysis and Data Mining: The ASA Data Science Journal* 2011; **4**(1): 54-70.
35. Dunbar T, Bourke L, Murakami-Gold L. More than just numbers! Perceptions of remote area nurse staffing in Northern Territory Government health clinics. *Aust J Rural Health* 2019; **27**(3): 245-50.

- 1  
2  
3 36. Bourke L, Dunbar T, Murakami-Gold L. Discourses within the roles of Remote Area  
4 Nurses in Northern Territory (Australia) government-run health clinics. *Health Soc Care*  
5 *Community* 2020.  
6  
7 37. Zhao Y, Russell DJ, Guthridge S, et al. Long-term trends in supply and sustainability of  
8 the health workforce in remote Aboriginal communities in the Northern Territory of  
9 Australia. *BMC Health Serv Res* 2017; **17**(1): 836.  
10  
11 38. Harfield SG, Davy C, McArthur A, Munn Z, Brown A, Brown N. Characteristics of  
12 Indigenous primary health care service delivery models: a systematic scoping review. *Global*  
13 *Health* 2018; **14**(1): 12.  
14  
15 39. Lavery M, McDermott DR, Calma T. Embedding cultural safety in Australia's main  
16 health care standards. *Med J Aust* 2017; **207**(1): 15-6.  
17  
18  
19  
20  
21  
22  
23  
24  
25  
26  
27  
28  
29  
30  
31  
32  
33  
34  
35  
36  
37  
38  
39  
40  
41  
42  
43  
44  
45  
46  
47  
48  
49  
50  
51  
52  
53  
54  
55  
56  
57  
58  
59  
60

**Table 1: Definitions of indicators measuring employment stability (main independent variables)**

| Measure                 | Definition                                                                                                                                                           |
|-------------------------|----------------------------------------------------------------------------------------------------------------------------------------------------------------------|
| Turnover rate           | $= \frac{\text{total number of exits}^{\dagger} \text{ in defined period}}{\text{average number of employees in defined period}}$                                    |
| Stability rate          | $= \frac{\text{Number of employees at start of defined period who remain employed at end of defined period}}{\text{Number of employees at start of defined period}}$ |
| Agency nurse proportion | $= \frac{\text{Agency – employed nurse FTE}}{\text{Total FTE nurse positions}}$                                                                                      |

FTE Full time equivalent

**Table 2: Definitions of quality indicators (dependent variables)**

| Indicator name                          | Definition                                                                                                                                                                                                                                                                                                         | Denominator Population                                                                          | Source of data |
|-----------------------------------------|--------------------------------------------------------------------------------------------------------------------------------------------------------------------------------------------------------------------------------------------------------------------------------------------------------------------|-------------------------------------------------------------------------------------------------|----------------|
| <b><i>Child and maternal health</i></b> |                                                                                                                                                                                                                                                                                                                    |                                                                                                 |                |
| First antenatal visit                   | Number and proportion of regular clients who attended a first antenatal visit (at any health service locality) <ol style="list-style-type: none"> <li>1. Before 13 weeks gestation</li> <li>2. At 20 weeks or more gestation</li> <li>3. Any antenatal visit</li> </ol>                                            | Resident women who gave birth to an Aboriginal or Torres Strait Islander baby                   | NT AHKPI       |
| Fully immunised children                | Number and proportion of Aboriginal or Torres Strait Islander children fully immunised at <ol style="list-style-type: none"> <li>1. 6 months to &lt; 1 year</li> <li>2. 1 year to &lt;2 years</li> <li>3. 2 years to &lt;6 years</li> <li>4. Any age and have received all age appropriate vaccinations</li> </ol> | Aboriginal or Torres Strait Islander resident children aged 6 months to <6 years                | NT AHKPI       |
| Anaemia test                            | Number and proportion of Aboriginal or Torres Strait Islander children who, in the past year have been tested for anaemia                                                                                                                                                                                          | Aboriginal or Torres Strait Islander resident children who are $\geq 6$ months old and <5 years | NT AHKPI       |

|                                                                             |                                                                                                                                                                                                                                  |                                                                                                                                                                |          |
|-----------------------------------------------------------------------------|----------------------------------------------------------------------------------------------------------------------------------------------------------------------------------------------------------------------------------|----------------------------------------------------------------------------------------------------------------------------------------------------------------|----------|
| Anaemia result                                                              | Number and proportion of Aboriginal or Torres Strait Islander children who, in the past year have been found to be anaemic                                                                                                       | Aboriginal or Torres Strait Islander resident children who are $\geq 6$ months old and $< 5$ years                                                             | NT AHKPI |
| <b>Chronic Disease Management</b>                                           |                                                                                                                                                                                                                                  |                                                                                                                                                                |          |
| Glycated haemoglobin (HbA1c) test                                           | Number and proportion of Aboriginal or Torres Strait Islander resident clients aged 15 years and over with Type 2 Diabetes Mellitus who have had a glycated haemoglobin (HbA1c) test in the past 12 months.                      | Aboriginal or Torres Strait Islander resident clients aged $\geq 15$ years diagnosed with Type 2 Diabetes Mellitus                                             | TLR      |
| Glycated haemoglobin (HbA1c) result                                         | Number and proportion of Aboriginal or Torres Strait Islander clients with Type 2 Diabetes Mellitus and whose most recent glycated haemoglobin (HbA1c) measurement within the past 12 months is $\leq 8\%$ ( $\leq 86$ mmol/mol) | Aboriginal or Torres Strait Islander resident clients aged $\geq 15$ years diagnosed with Type 2 Diabetes Mellitus and had glycated haemoglobin (HbA1c) tested | TLR      |
| Angiotensin Converting Enzyme Inhibitor and/or Angiotensin Receptor Blocker | Number and proportion of Aboriginal or Torres Strait Islander clients with Type 2 Diabetes Mellitus with albuminuria who are on Angiotensin Converting Enzyme Inhibitor and/or an Angiotensin Receptor Blocker.                  | Aboriginal or Torres Strait Islander resident clients aged $\geq 15$ years diagnosed with Type 2 Diabetes Mellitus and albuminuria                             | TLR      |

|                                                                                  |                          |                                                                                                                                                                                                                                             |                                                                                                          |          |
|----------------------------------------------------------------------------------|--------------------------|---------------------------------------------------------------------------------------------------------------------------------------------------------------------------------------------------------------------------------------------|----------------------------------------------------------------------------------------------------------|----------|
| 1<br>2<br>3<br>4<br>5<br>6<br>7<br>8<br>9<br>10<br>11<br>12                      | Non-smoking              | Number and proportion of Aboriginal or Torres Strait Islander clients who are ex- or never smokers of cigarettes                                                                                                                            | Aboriginal or Torres Strait Islander residents aged $\geq 15$ who have had their smoking status recorded | TLR      |
| 13<br>14                                                                         | <b>Preventive Health</b> |                                                                                                                                                                                                                                             |                                                                                                          |          |
| 15<br>16<br>17<br>18<br>19<br>20<br>21<br>22<br>23<br>24<br>25<br>26<br>27<br>28 | Pap smear tests          | Number and proportion of eligible Aboriginal or Torres Strait Islander women who have had at least one Pap smear test during the last: <ol style="list-style-type: none"> <li>1. 2 years</li> <li>2. 3 years</li> <li>3. 5 years</li> </ol> | Aboriginal or Torres Strait Islander resident women aged 20-69 inclusive                                 | NT AHKPI |
| 29<br>30<br>31<br>32<br>33<br>34<br>35<br>36<br>37                               | Adult health check 15-55 | Number and proportion of Aboriginal or Torres Strait Islander clients who have had a full adult health check.                                                                                                                               | Aboriginal or Torres Strait Islander resident clients aged 15 years to < 55 years                        | TLR      |
| 38<br>39<br>40<br>41<br>42<br>43<br>44                                           | Adult health check 55+   | Number and proportion of Aboriginal or Torres Strait Islander clients who have had a full adult health check.                                                                                                                               | Aboriginal or Torres Strait Islander resident clients aged $\geq 55$ years                               | TLR      |

NTAHKPI Northern Territory Aboriginal Health Key Performance Indicator data

TLR Traffic light reports

**Table 3. NT Department of Health clinics, characterised by staff employment stability indicators and quality indicators, 2011-2015**

| Characteristics                                                | Mean | Standard Deviation | Minimum | Maximum | Number of clinics |
|----------------------------------------------------------------|------|--------------------|---------|---------|-------------------|
| Markers of staff employment stability                          |      |                    |         |         |                   |
| Average annual head count                                      | 4.50 | 3.80               | 0.28    | 19.17   | 48                |
| Turnover rate                                                  | 0.07 | 0.03               | 0.00    | 0.18    | 48                |
| Stability rate                                                 | 0.40 | 0.14               | 0.00    | 0.77    | 48                |
| Agency nurse proportion                                        | 0.16 | 0.09               | 0.00    | 0.42    | 48                |
| <i>Quality indicators<sup>†</sup></i>                          |      |                    |         |         |                   |
| First antenatal visit<br>(1. before 13 weeks' gestation)       | 0.49 | 0.16               | 0.17    | 0.96    | 47                |
| First antenatal visit<br>(2. at or before 20 weeks' gestation) | 0.72 | 0.15               | 0.23    | 1.00    | 47                |
| First antenatal visit<br>(3. any antenatal care)               | 0.98 | 0.04               | 0.80    | 1.00    | 47                |
| Fully immunised children (6-11 months)                         | 0.88 | 0.08               | 0.63    | 1.00    | 47                |
| Fully immunised children (12-23 months)                        | 0.83 | 0.12               | 0.54    | 1.00    | 47                |
| Fully immunised children (24-71 months)                        | 0.80 | 0.08               | 0.58    | 0.935   | 47                |
| Fully immunised children (any age)                             | 0.81 | 0.08               | 0.60    | 0.93    | 47                |
| Anaemia test                                                   | 0.78 | 0.09               | 0.50    | 0.90    | 47                |
| Anaemia result                                                 | 0.17 | 0.05               | 0.06    | 0.30    | 47                |
| Glycated haemoglobin (HbA1c) test                              | 0.92 | 0.04               | 0.84    | 1.00    | 46                |
| Glycated haemoglobin (HbA1c) result≤8%                         | 0.48 | 0.10               | 0.23    | 0.71    | 47                |

|                                                                                |      |      |      |      |    |
|--------------------------------------------------------------------------------|------|------|------|------|----|
| Angiotensin Converting Enzyme Inhibitor<br>and/or Angiotensin Receptor Blocker | 0.84 | 0.10 | 0.59 | 1.00 | 46 |
| Non-smoking                                                                    | 0.52 | 0.14 | 0.24 | 0.73 | 47 |
| Adult health check 55+                                                         | 0.34 | 0.12 | 0.09 | 0.72 | 47 |
| Adult health check 15-54                                                       | 0.42 | 0.15 | 0.11 | 0.75 | 47 |
| Pap smear 2yrs                                                                 | 0.50 | 0.12 | 0.20 | 0.79 | 47 |
| Pap smear 3yrs                                                                 | 0.40 | 0.07 | 0.18 | 0.55 | 47 |
| Pap smear 5yrs                                                                 | 0.46 | 0.06 | 0.24 | 0.56 | 47 |

†One of the 48 health clinics did not independently report on any quality indicators during the study period. A second health clinic did not report on Glycated haemoglobin tests and Angiotensin Converting Enzyme Inhibitor and/or Angiotensin Receptor Blocker quality indicators.



1  
2  
3  
4  
5  
6  
7  
8  
9  
10  
11  
12  
13  
14  
15  
16  
17  
18  
19  
20  
21  
22  
23  
24  
25  
26  
27  
28  
29  
30  
31  
32  
33  
34  
35  
36  
37  
38  
39  
40  
41  
42  
43  
44  
45  
46  
47  
48  
49  
50  
51  
52  
53  
54  
55  
56  
57  
58  
59  
60

**Table 4. Associations between markers of staff employment stability and quality indicators**

For peer review only

| Indicator                                                | Staffing measure | Slope <sup>A</sup> | 95% Confidence Interval95% Confidence Interval |             | p-value | SD <sup>B</sup> |
|----------------------------------------------------------|------------------|--------------------|------------------------------------------------|-------------|---------|-----------------|
|                                                          |                  |                    | Lower Limit                                    | Upper Limit |         |                 |
|                                                          |                  |                    |                                                |             |         |                 |
| First antenatal visit (before 13 weeks' gestation)       | Turnover         | 0.023              | -0.010                                         | 0.056       | 0.2     | 0.33            |
|                                                          | Agency nurse     | -0.060             | -0.178                                         | 0.059       | 0.3     | 1.03            |
|                                                          | Stability        | 0.001              | -0.113                                         | 0.115       | >0.9    | 0.55            |
| First antenatal visit (at or before 20 weeks' gestation) | Turnover         | 0.026              | -0.018                                         | 0.070       | 0.3     | 0.27            |
|                                                          | Agency nurse     | -0.088             | -0.231                                         | 0.056       | 0.2     | 1.10            |
|                                                          | Stability        | 0.008              | -0.091                                         | 0.107       | 0.9     | 0.44            |
| First antenatal visit (any antenatal care)               | Turnover         | -0.001             | -0.006                                         | 0.004       | 0.7     | 0.13            |
|                                                          | Agency nurse     | 0.015              | -0.028                                         | 0.058       | 0.5     | 0.38            |
|                                                          | Stability        | 0.007              | -0.015                                         | 0.030       | 0.5     | 0.27            |
| Fully immunised children (6-11 months)                   | Turnover         | -0.061             | -0.119                                         | -0.002      | 0.04    | 0.36            |
|                                                          | Agency nurse     | 0.022              | -0.135                                         | 0.179       | 0.8     | 1.21            |
|                                                          | Stability        | 0.011              | -0.073                                         | 0.095       | 0.8     | 0.51            |
| Fully immunised children (12-23 months)                  | Turnover         | -0.001             | -0.017                                         | 0.015       | 0.9     | 0.16            |
|                                                          | Agency nurse     | -0.049             | -0.155                                         | 0.057       | 0.4     | 0.63            |

|                                                |              |        |        |        |      |      |
|------------------------------------------------|--------------|--------|--------|--------|------|------|
|                                                | Stability    | -0.017 | -0.062 | 0.028  | 0.5  | 0.25 |
| Fully immunised children (24-71 months)        | Turnover     | -0.012 | -0.030 | 0.006  | 0.2  | 0.11 |
|                                                | Agency nurse | -0.056 | -0.122 | 0.009  | 0.09 | 0.43 |
|                                                | Stability    | 0.002  | -0.034 | 0.037  | 0.9  | 0.23 |
| Fully immunised children (any age)             | Turnover     | 0.002  | -0.008 | 0.013  | 0.7  | 0.10 |
|                                                | Agency nurse | -0.061 | -0.118 | -0.005 | 0.03 | 0.38 |
|                                                | Stability    | 0.004  | -0.025 | 0.033  | 0.8  | 0.19 |
| Anaemia result                                 | Turnover     | 0.011  | -0.025 | 0.048  | 0.5  | 0.10 |
|                                                | Agency nurse | 0.019  | -0.055 | 0.093  | 0.6  | 0.62 |
|                                                | Stability    | 0.042  | -0.008 | 0.092  | 0.1  | 0.24 |
| Anaemia test                                   | Turnover     | 0.017  | 0.000  | 0.034  | 0.06 | 0.11 |
|                                                | Agency nurse | 0.023  | -0.046 | 0.092  | 0.5  | 0.55 |
|                                                | Stability    | 0.002  | -0.041 | 0.045  | >0.9 | 0.32 |
| Glycated haemoglobin (HbA1c) test              | Turnover     | -0.006 | -0.024 | 0.012  | 0.5  | 0.11 |
|                                                | Agency nurse | -0.003 | -0.076 | 0.070  | 0.9  | 0.57 |
|                                                | Stability    | 0.015  | -0.015 | 0.044  | 0.3  | 0.20 |
| Glycated haemoglobin (HbA1c) result            | Turnover     | -0.006 | -0.022 | 0.010  | 0.5  | 0.24 |
|                                                | Agency nurse | 0.037  | -0.026 | 0.101  | 0.3  | 0.27 |
|                                                | Stability    | -0.036 | -0.066 | -0.007 | 0.02 | 0.26 |
| Angiotensin Converting Enzyme Inhibitor and/or | Turnover     | -0.025 | -0.060 | 0.010  | 0.2  | 0.24 |
| Angiotensin Receptor Blocker                   | Agency nurse | 0.053  | -0.104 | 0.210  | 0.5  | 0.35 |
|                                                | Stability    | 0.044  | -0.010 | 0.097  | 0.1  | 0.34 |
| Non-smoking                                    | Turnover     | -0.007 | -0.019 | 0.005  | 0.3  | 0.28 |

|                               |              |        |        |        |       |      |
|-------------------------------|--------------|--------|--------|--------|-------|------|
|                               | Agency nurse | 0.005  | -0.043 | 0.053  | 0.8   | 0.28 |
|                               | Stability    | -0.005 | -0.033 | 0.023  | 0.7   | 0.29 |
| Adult health check aged 15-55 | Turnover     | 0.031  | -0.003 | 0.066  | 0.08  | 0.12 |
|                               | Agency nurse | 0.129  | -0.036 | 0.294  | 0.1   | 0.59 |
|                               | Stability    | -0.056 | -0.119 | 0.006  | 0.08  | 0.38 |
| Adult health check aged 55+   | Turnover     | 0.024  | -0.040 | 0.087  | 0.5   | 0.21 |
|                               | Agency nurse | 0.265  | 0.073  | 0.457  | 0.007 | 1.01 |
|                               | Stability    | -0.027 | -0.145 | 0.091  | 0.7   | 0.56 |
| Pap smear 2yrs                | Turnover     | -0.007 | -0.019 | 0.005  | 0.2   | 0.09 |
|                               | Agency nurse | -0.058 | -0.127 | 0.011  | 0.1   | 0.47 |
|                               | Stability    | 0.006  | -0.038 | 0.051  | 0.80  | 0.20 |
| Pap smear 3yrs                | Turnover     | -0.021 | -0.038 | -0.004 | 0.01  | 0.18 |
|                               | Agency nurse | -0.053 | -0.137 | 0.030  | 0.20  | 0.73 |
|                               | Stability    | 0.050  | -0.030 | 0.130  | 0.20  | 0.51 |
| Pap smear 5yrs                | Turnover     | -0.023 | -0.041 | -0.005 | 0.01  | 0.20 |
|                               | Agency nurse | -0.048 | -0.155 | 0.059  | 0.40  | 0.83 |
|                               | Stability    | 0.057  | -0.030 | 0.143  | 0.20  | 0.59 |

<sup>A</sup>Slope= $\beta$  coefficient

<sup>B</sup>Standard deviation (SD) of clinic-specific estimates of association

**Table 5. NT Department of Health clinic clusters, characterised by staff employment stability indicators, geographical remoteness and socio-economic disadvantage, 2011-2015**

| Cluster Number                                              | Mean |     |      | Standard Deviation |     |     |
|-------------------------------------------------------------|------|-----|------|--------------------|-----|-----|
|                                                             | 1    | 2   | 3    | 1                  | 2   | 3   |
| Number of clinics                                           | 9    | 16  | 19   | 9                  | 16  | 19  |
| <i><sup>A</sup>Average</i>                                  |      |     |      |                    |     |     |
| Staff count                                                 | 10.2 | 4.3 | 2.8  | 4.6                | 2.3 | 0.9 |
| Staff exits                                                 | 2.2  | 0.7 | 0.8  | 0.6                | 0.5 | 0.3 |
| Turnover rate                                               | 0.2  | 0.2 | 0.3  | 0.1                | 0.1 | 0.1 |
| Stability rate                                              | 0.5  | 0.6 | 0.4  | 0.1                | 0.1 | 0.1 |
| Agency nurse proportion                                     | 0.2  | 0.2 | 0.2  | 0.1                | 0.1 | 0.1 |
| <i><sup>B</sup>Within-clinic standard deviation</i>         |      |     |      |                    |     |     |
| Staff count                                                 | 1.7  | 0.7 | 0.8  | 0.7                | 0.3 | 0.4 |
| Staff exits                                                 | 2.2  | 0.9 | 1.0  | 0.9                | 0.4 | 0.3 |
| Turnover rate                                               | 0.2  | 0.2 | 0.4  | 0.1                | 0.1 | 0.1 |
| Stability rate                                              | 0.1  | 0.2 | 0.3  | 0.1                | 0.1 | 0.1 |
| Agency nurse proportion                                     | 0.1  | 0.1 | 0.2  | 0.1                | 0.1 | 0.1 |
| <i>Time-invariant</i>                                       |      |     |      |                    |     |     |
| Population (2015)                                           | 1391 | 505 | 338  | 1012               | 395 | 229 |
| Index of Relative Socio-economic Advantage and Disadvantage | 652  | 746 | 709  | 84                 | 122 | 137 |
| Google distance to Darwin or Alice Springs                  | 313  | 267 | 332  | 222                | 167 | 220 |
| Predominantly non-Aboriginal: % (count)                     | 0.0  | 6.3 | 15.8 | 0                  | 1   | 3   |

<sup>A</sup>Based on calculating a single average per clinic over the recording period

<sup>B</sup>Based on calculating a single standard deviation per clinic over the recording period

**Table 6. Associations between NT Department of Health clinic clusters and quality indicators, 2011-2015**

|                                                                                      | Mean         |      |      |         | Standard Deviation |      |      |         |
|--------------------------------------------------------------------------------------|--------------|------|------|---------|--------------------|------|------|---------|
|                                                                                      | Clusters (3) |      |      | Overall | Clusters (3)       |      |      | Overall |
|                                                                                      | 1            | 2    | 3    |         | 1                  | 2    | 3    |         |
| <b>First antenatal visit by 13 weeks</b>                                             | 0.50         | 0.49 | 0.48 | 0.49    | 0.10               | 0.13 | 0.15 | 0.13    |
| <b>First antenatal visit by 20 weeks</b>                                             | 0.74         | 0.75 | 0.70 | 0.72    | 0.06               | 0.14 | 0.15 | 0.14    |
| <b>First antenatal visit any time</b>                                                | 0.98         | 0.98 | 0.98 | 0.98    | 0.01               | 0.06 | 0.03 | 0.04    |
| <b>Child immunisation 6-11m</b>                                                      | 0.86         | 0.90 | 0.89 | 0.89    | 0.07               | 0.08 | 0.07 | 0.08    |
| <b>Child immunisation 12-23m</b>                                                     | 0.84         | 0.84 | 0.87 | 0.85    | 0.10               | 0.12 | 0.11 | 0.11    |
| <b>Child immunisation 24-71m</b>                                                     | 0.82         | 0.78 | 0.81 | 0.80    | 0.09               | 0.09 | 0.07 | 0.08    |
| <b>Child immunisation (all)</b>                                                      | 0.83         | 0.80 | 0.82 | 0.81    | 0.08               | 0.09 | 0.06 | 0.08    |
| <b>Anaemia test</b>                                                                  | 0.81         | 0.79 | 0.79 | 0.79    | 0.06               | 0.06 | 0.09 | 0.07    |
| <b>Anaemia result **</b>                                                             | 0.21         | 0.16 | 0.16 | 0.17    | 0.03               | 0.06 | 0.06 | 0.06    |
| <b>Glycated haemoglobin (HbA1c) test</b>                                             | 0.90         | 0.93 | 0.93 | 0.92    | 0.04               | 0.04 | 0.04 | 0.04    |
| <b>Glycated haemoglobin (HbA1c) result</b>                                           | 0.48         | 0.50 | 0.48 | 0.49    | 0.09               | 0.07 | 0.13 | 0.10    |
| <b>Angiotensin Converting Enzyme Inhibitor and/or Angiotensin Receptor Blocker**</b> | 0.74         | 0.84 | 0.88 | 0.84    | 0.11               | 0.05 | 0.08 | 0.09    |
| <b>Non-smoking</b>                                                                   | 0.49         | 0.52 | 0.53 | 0.52    | 0.14               | 0.13 | 0.15 | 0.14    |
| <b>Adult health check aged 15-54</b>                                                 | 0.31         | 0.34 | 0.37 | 0.35    | 0.13               | 0.14 | 0.12 | 0.12    |
| <b>Adult health check aged 55+</b>                                                   | 0.45         | 0.45 | 0.38 | 0.42    | 0.15               | 0.15 | 0.16 | 0.15    |
| <b>Pap smear 2 years</b>                                                             | 0.51         | 0.52 | 0.50 | 0.51    | 0.12               | 0.10 | 0.12 | 0.11    |

|                          | Mean         |      |      |         | Standard Deviation |      |      |         |
|--------------------------|--------------|------|------|---------|--------------------|------|------|---------|
|                          | Clusters (3) |      |      | Overall | Clusters (3)       |      |      | Overall |
|                          | 1            | 2    | 3    |         | 1                  | 2    | 3    |         |
| <b>Pap smear 3 years</b> | 0.40         | 0.42 | 0.41 | 0.41    | 0.07               | 0.07 | 0.07 | 0.07    |
| <b>Pap smear 5 years</b> | 0.45         | 0.47 | 0.46 | 0.46    | 0.05               | 0.05 | 0.05 | 0.05    |

\*\* p<0.001

For peer review only

**Table 7. Variation in mean associations between NT Department of Health clinic clusters and quality indicators, 2011-2015**

| Cluster                                                                     | Stability |        |        | Turnover |        |        | Agency nurse % |        |        |
|-----------------------------------------------------------------------------|-----------|--------|--------|----------|--------|--------|----------------|--------|--------|
|                                                                             | 1         | 2      | 3      | 1        | 2      | 3      | 1              | 2      | 3      |
| First antenatal visit 13wks                                                 | 0.176     | -0.012 | -0.110 | -0.058   | 0.061  | 0.013  | 0.029          | 0.002  | -0.289 |
| First antenatal visit 20wks                                                 | 0.180     | 0.065  | -0.046 | -0.020   | 0.023  | -0.091 | 0.101          | 0.084  | -0.261 |
| First antenatal visit any                                                   | -0.050*   | -0.113 | 0.054  | -0.015   | 0.023  | -0.038 | -0.082         | 0.201  | -0.018 |
| Immunisation 6-11m                                                          | 0.115     | -0.181 | 0.026  | -0.155   | 0.011  | 0.117  | 0.087          | -0.263 | 0.304  |
| Immunisation 12-23m                                                         | 0.083     | 0.113  | -0.079 | 0.002    | 0.012  | 0.039  | 0.075          | -0.106 | 0.362  |
| Immunisation 24-71m                                                         | 0.114     | 0.107  | -0.002 | 0.057    | 0.039  | -0.005 | -0.174         | -0.303 | -0.117 |
| Immunisation overall                                                        | 0.128     | 0.098  | -0.008 | 0.031    | 0.034  | -0.010 | -0.106         | -0.242 | -0.016 |
| Anaemia test                                                                | 0.162     | 0.027  | 0.107  | -0.000   | 0.008  | -0.032 | -0.050         | 0.034  | 0.050  |
| Anaemia result                                                              | -0.011    | -0.023 | 0.065  | -0.016   | -0.001 | 0.006  | -0.032         | 0.118  | 0.142  |
| Glycated haemoglobin (HbA1c) test                                           | 0.115     | -0.467 | 0.152  | 0.311    | 0.050  | -0.033 | 0.298          | -0.392 | -0.352 |
| Glycated haemoglobin (HbA1c) result                                         | -0.060    | 0.048  | 0.233  | -0.078   | 0.014  | 0.039  | -0.020         | -0.183 | -0.060 |
| Angiotensin Converting Enzyme Inhibitor and/or Angiotensin Receptor Blocker | -1.048    | -0.015 | 0.000  | -0.615   | -0.257 | -0.046 | 0.298          | -0.392 | -0.352 |
| Non-smoking                                                                 | 0.067     | 0.012  | -0.017 | 0.024    | 0.037  | -0.019 | -0.021         | 0.002  | 0.122  |
| Pap smear 2yrs                                                              | 0.173*    | -0.015 | -0.016 | -0.037   | 0.003  | 0.024  | -0.086         | -0.101 | -0.061 |
| Pap smear 3yrs                                                              | -0.331    | -0.041 | -0.012 | -0.084   | 0.061  | -0.052 | -0.070         | -0.382 | 0.054  |
| Pap smear 5yrs                                                              | -0.371    | -0.065 | 0.017  | -0.086   | 0.061  | -0.058 | -0.031         | -0.385 | 0.055  |



|                          | Stability |        |        | Turnover |        |        | Agency nurse % |       |        |
|--------------------------|-----------|--------|--------|----------|--------|--------|----------------|-------|--------|
| Cluster                  | 1         | 2      | 3      | 1        | 2      | 3      | 1              | 2     | 3      |
| Adult health check 15-54 | -0.220    | -0.009 | -0.229 | -0.464   | -0.278 | -0.124 | 0.733          | 0.077 | -0.098 |
| Adult health check 55+   | -0.478    | 0.218  | -0.382 | -0.403   | -0.169 | -0.126 | 2.825          | 0.310 | 0.315  |

\* p<0.05

For peer review only

1  
2  
3 **Figure 1. Distribution of clinic-specific associations between proportional use of agency**  
4  
5 **nurses and antenatal care quality of care indicators**  
6  
7  
8  
9  
10  
11  
12  
13  
14  
15  
16  
17  
18  
19  
20  
21  
22  
23  
24  
25  
26  
27  
28  
29  
30  
31  
32  
33  
34  
35  
36  
37  
38  
39  
40  
41  
42  
43  
44  
45  
46  
47  
48  
49  
50  
51  
52  
53  
54  
55  
56  
57  
58  
59  
60

For peer review only

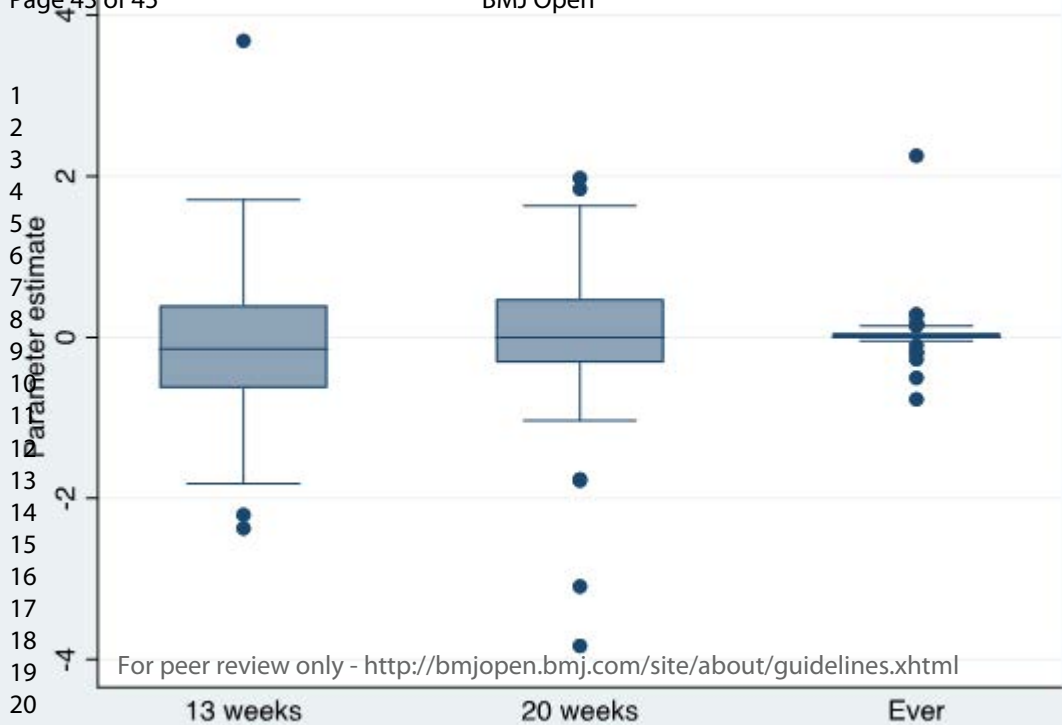

For peer review only - <http://bmjopen.bmj.com/site/about/guidelines.xhtml>

20  
21

**STROBE 2007 (v4) Statement—Checklist of items that should be included in reports of *cohort studies***

| Section/Topic                | Item # | Recommendation                                                                                                                                                                       | Reported on page #          |
|------------------------------|--------|--------------------------------------------------------------------------------------------------------------------------------------------------------------------------------------|-----------------------------|
| <b>Title and abstract</b>    | 1      | (a) Indicate the study's design with a commonly used term in the title or the abstract                                                                                               | 1                           |
|                              |        | (b) Provide in the abstract an informative and balanced summary of what was done and what was found                                                                                  | 3-4                         |
| <b>Introduction</b>          |        |                                                                                                                                                                                      |                             |
| Background/rationale         | 2      | Explain the scientific background and rationale for the investigation being reported                                                                                                 | 5-7                         |
| Objectives                   | 3      | State specific objectives, including any prespecified hypotheses                                                                                                                     | 7                           |
| <b>Methods</b>               |        |                                                                                                                                                                                      |                             |
| Study design                 | 4      | Present key elements of study design early in the paper                                                                                                                              | 7                           |
| Setting                      | 5      | Describe the setting, locations, and relevant dates, including periods of recruitment, exposure, follow-up, and data collection                                                      | 7                           |
| Participants                 | 6      | (a) Give the eligibility criteria, and the sources and methods of selection of participants. Describe methods of follow-up                                                           | 8                           |
|                              |        | (b) For matched studies, give matching criteria and number of exposed and unexposed                                                                                                  | n/a                         |
| Variables                    | 7      | Clearly define all outcomes, exposures, predictors, potential confounders, and effect modifiers. Give diagnostic criteria, if applicable                                             | 8-10                        |
| Data sources/<br>measurement | 8*     | For each variable of interest, give sources of data and details of methods of assessment (measurement). Describe comparability of assessment methods if there is more than one group | 8-10                        |
| Bias                         | 9      | Describe any efforts to address potential sources of bias                                                                                                                            | 10-11                       |
| Study size                   | 10     | Explain how the study size was arrived at                                                                                                                                            | n/a                         |
| Quantitative variables       | 11     | Explain how quantitative variables were handled in the analyses. If applicable, describe which groupings were chosen and why                                                         | 10-11                       |
| Statistical methods          | 12     | (a) Describe all statistical methods, including those used to control for confounding                                                                                                | 10-11                       |
|                              |        | (b) Describe any methods used to examine subgroups and interactions                                                                                                                  | 10-11                       |
|                              |        | (c) Explain how missing data were addressed                                                                                                                                          | See comment beneath Table 3 |
|                              |        | (d) If applicable, explain how loss to follow-up was addressed                                                                                                                       | n/a                         |
|                              |        | (e) Describe any sensitivity analyses                                                                                                                                                | n/a                         |

| <b>Results</b>           |     |                                                                                                                                                                                                              |                                                    |
|--------------------------|-----|--------------------------------------------------------------------------------------------------------------------------------------------------------------------------------------------------------------|----------------------------------------------------|
| Participants             | 13* | (a) Report numbers of individuals at each stage of study—eg numbers potentially eligible, examined for eligibility, confirmed eligible, included in the study, completing follow-up, and analysed            | Table 3 (numbers of participating health services) |
|                          |     | (b) Give reasons for non-participation at each stage                                                                                                                                                         | n/a                                                |
|                          |     | (c) Consider use of a flow diagram                                                                                                                                                                           | n/a                                                |
| Descriptive data         | 14* | (a) Give characteristics of study participants (eg demographic, clinical, social) and information on exposures and potential confounders                                                                     | Table 5, reported by clinic clusters               |
|                          |     | (b) Indicate number of participants with missing data for each variable of interest                                                                                                                          | Table 3                                            |
|                          |     | (c) Summarise follow-up time (eg, average and total amount)                                                                                                                                                  | n/a                                                |
| Outcome data             | 15* | Report numbers of outcome events or summary measures over time                                                                                                                                               | n/a – time course is summarized in analysis        |
| Main results             | 16  | (a) Give unadjusted estimates and, if applicable, confounder-adjusted estimates and their precision (eg, 95% confidence interval). Make clear which confounders were adjusted for and why they were included | n/a – relevant confounders not established         |
|                          |     | (b) Report category boundaries when continuous variables were categorized                                                                                                                                    | n/a                                                |
|                          |     | (c) If relevant, consider translating estimates of relative risk into absolute risk for a meaningful time period                                                                                             | n/a                                                |
| Other analyses           | 17  | Report other analyses done—eg analyses of subgroups and interactions, and sensitivity analyses                                                                                                               | Table 5                                            |
| <b>Discussion</b>        |     |                                                                                                                                                                                                              |                                                    |
| Key results              | 18  | Summarise key results with reference to study objectives                                                                                                                                                     | 15-16                                              |
| <b>Limitations</b>       |     |                                                                                                                                                                                                              |                                                    |
| Interpretation           | 20  | Give a cautious overall interpretation of results considering objectives, limitations, multiplicity of analyses, results from similar studies, and other relevant evidence                                   | 15-17                                              |
| Generalisability         | 21  | Discuss the generalisability (external validity) of the study results                                                                                                                                        | 17                                                 |
| <b>Other information</b> |     |                                                                                                                                                                                                              |                                                    |
| Funding                  | 22  | Give the source of funding and the role of the funders for the present study and, if applicable, for the original study on which the present article is based                                                | 18-19                                              |

\*Give information separately for cases and controls in case-control studies and, if applicable, for exposed and unexposed groups in cohort and cross-sectional studies.

1  
2  
3 **Note:** An Explanation and Elaboration article discusses each checklist item and gives methodological background and published examples of transparent reporting. The STROBE  
4 checklist is best used in conjunction with this article (freely available on the Web sites of PLoS Medicine at <http://www.plosmedicine.org/>, Annals of Internal Medicine at  
5 <http://www.annals.org/>, and Epidemiology at <http://www.epidem.com/>). Information on the STROBE Initiative is available at [www.strobe-statement.org](http://www.strobe-statement.org).  
6  
7  
8  
9  
10  
11  
12  
13  
14  
15  
16  
17  
18  
19  
20  
21  
22  
23  
24  
25  
26  
27  
28  
29  
30  
31  
32  
33  
34  
35  
36  
37  
38  
39  
40  
41  
42  
43  
44  
45  
46

For peer review only
